# Supplementary material for: Sequence features of retrotransposons allow for epigenetic variability
Source: eLife journal article supplement (doi:10.7554/elife.71104), 2021-10-20
Supplement: supp [file elife_poa_e71104_Figure_1_figure_supplement_3.pdf › elife_poa_e71104_Figure_1_figure_supplement_3.pdf]

# IAPLTR1

GM21082

ZFP429

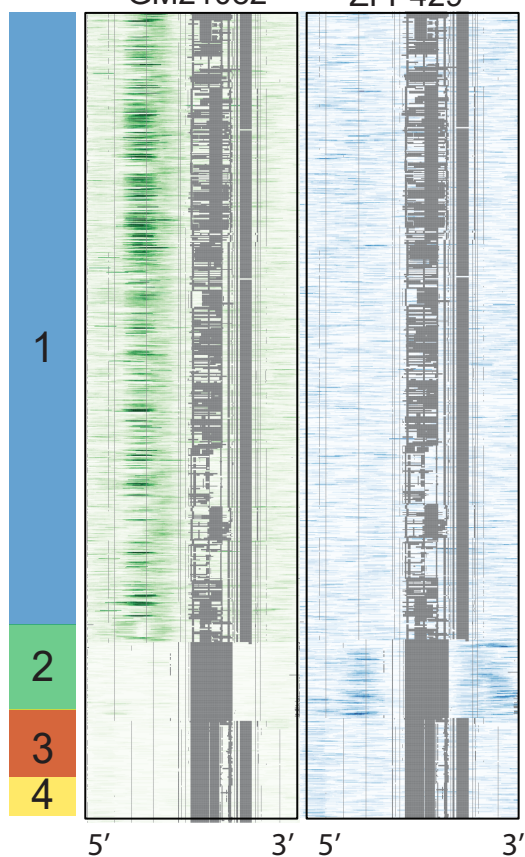

IAPLTR1\_Mm Sequence

5' 3'

Zfp989/Gm21082 enrichment

Clade 1  
 TGTGCTCTGCC TTCCCCGTGACGTCAACT  
 Clade 2  
 TGTACTCTACC TTTCCCGTGAACGTCAGC  
 Clade 3/4  
 TGTACTCTGTTTTTCCC GTGAACGTCAGC

Gm21082  
 annotated motif

CCCTCC C GA GTCAGC
