# Supplementary material for: Sequence features of retrotransposons allow for epigenetic variability
Source: eLife journal article supplement (doi:10.7554/elife.71104), 2021-10-20
Supplement: supp [file elife_poa_e71104_Figure_1_figure_supplement_5.pdf › elife_poa_e71104_Figure_1_figure_supplement_5.pdf]

All IAPLTR2s

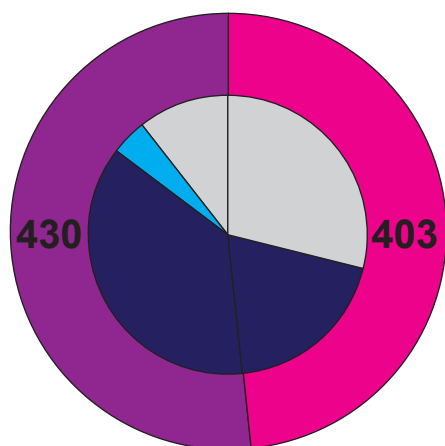

VM-IAPLTR2s

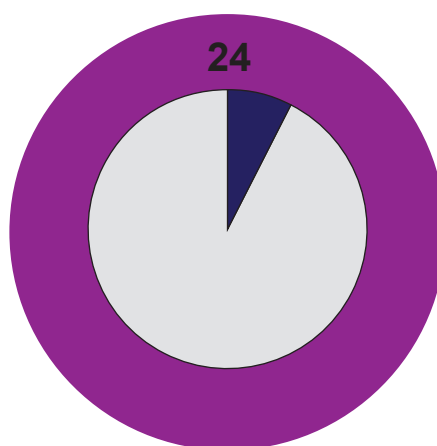

IAPLTR2

IAPEz-int

Clade 1

Clade 2

Clade α

Clade β

Clade γ

Solo LTR
