# Supplementary material for: Sequence features of retrotransposons allow for epigenetic variability
Source: eLife journal article supplement (doi:10.7554/elife.71104), 2021-10-20

**Clade 3 IAPLTR1s (FPKM >2)**

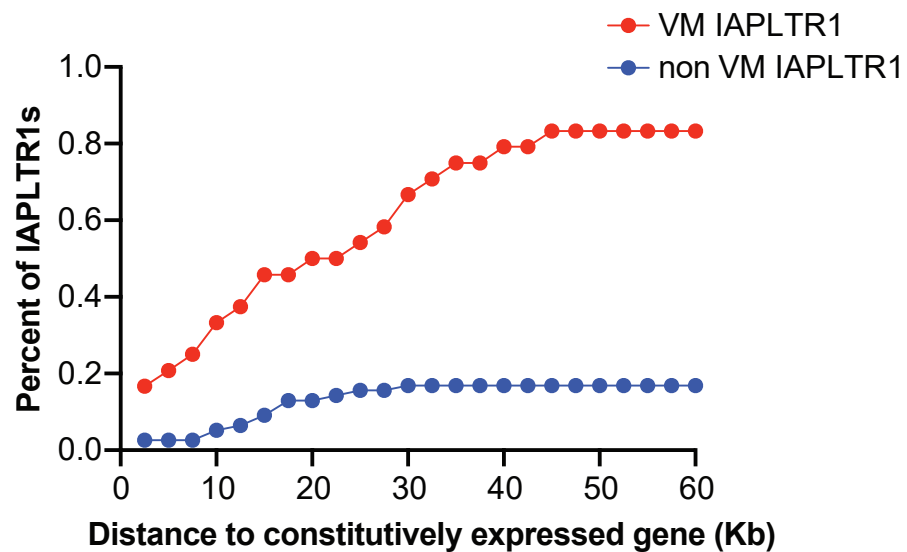

**Clade 3 IAPLTR1s (distance <50kb)**

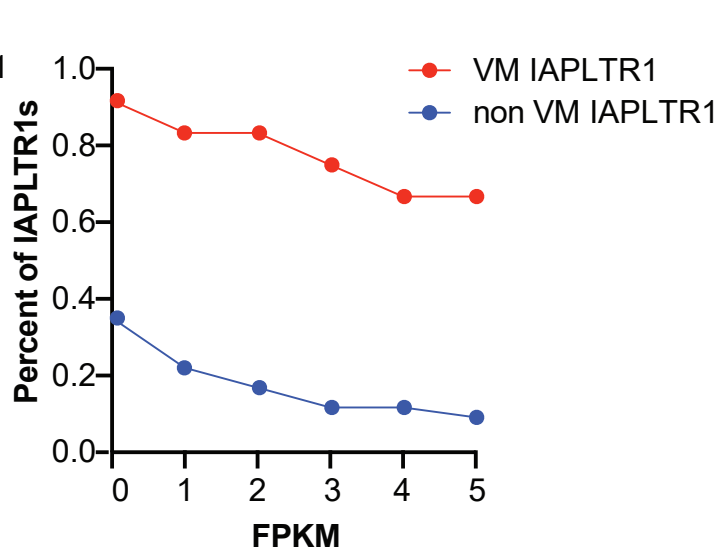

Supplement: supp [file elife_poa_e71104_Figure_1_figure_supplement_6.pdf › elife_poa_e71104_Figure_1_figure_supplement_6.pdf]
