# Supplementary material for: Sequence features of retrotransposons allow for epigenetic variability
Source: eLife journal article supplement (doi:10.7554/elife.71104), 2021-10-20

Tc1 mouse  
Chromosome 21 TE methylation

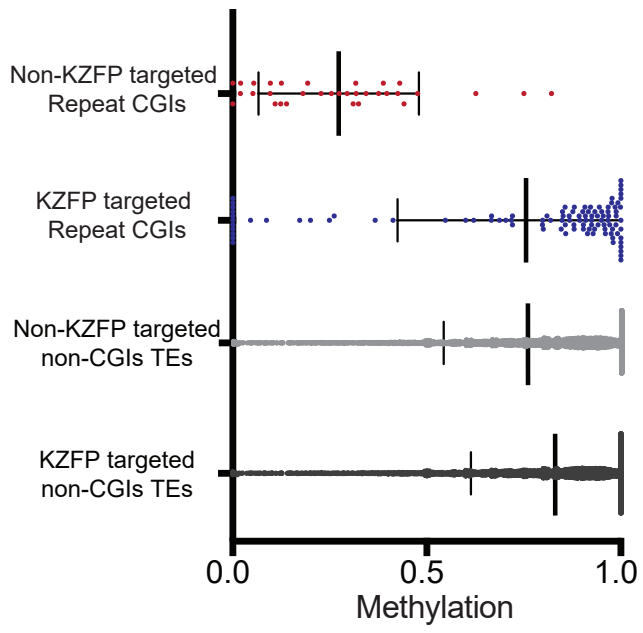

Supplement: supp [file elife_poa_e71104_Figure_4_figure_supplement_1.pdf › elife_poa_e71104_Figure_4_figure_supplement_1.pdf]
