# Supplementary material for: Sequence features of retrotransposons allow for epigenetic variability
Source: eLife journal article supplement (doi:10.7554/elife.71104), 2021-10-20
Supplement: supp [file elife_poa_e71104_Figure_6_figure_supplement_1.pdf › elife_poa_e71104_Figure_6_figure_supplement_1.pdf]

Clade 1

ACGTCCGAGGCCGAAGGAGAATGCTCCTT\_AAG A

Clade 2

GCGTCCTAGGcGAAATATAACTCTCCT AAAGA

Clade 3

GCGCCCTAGGCAATGGTTGTTCTCTTT AAAAT

Clade 4

GCGTCCTAGGCAATTGTTGTTCTCTTT AAAGA

C3H

“Master”

IAPLTR

GCGCCCTAGGCAATGGTTGTTCTCTTT AAAAT
