# Supplementary material for: Sequence features of retrotransposons allow for epigenetic variability
Source: eLife. 2021 Oct 20;10:e71104. doi: 10.7554/eLife.71104 (PMC8555987; doi:10.7554/eLife.71104)
Supplement: Supplementary file 1. [file elife-71104-supp1.xlsx]

## Sheet: IAPLTR1_Mm
UCSC position	Clade
chr1:67758201-67758537	1
chr1:67751446-67751782	1
chr2:50679608-50679944	1
chr2:50686367-50686703	1
chrY:21229771-21230107	1
chrY:21226108-21226444	1
chr13:66019054-66019390	1
chr13:66012298-66012634	1
chr6:142148972-142149309	1
chr6:142155726-142156063	1
chr14:53475171-53475505	1
chr14:53479338-53479672	1
chr6:97379080-97379449	1
chr6:97372257-97372626	1
chr5:91226773-91227170	1
chr5:91233636-91234033	1
chr9:78823303-78823657	1
chr9:78830019-78830373	1
chr11:4048950-4049321	1
chr1:103211919-103212290	1
chr1:103205166-103205537	1
chr11:20520807-20521191	1
chr11:20516396-20516780	1
chr8:117767268-117767665	1
chr18:69159404-69159786	1
chr6:117339636-117339987	1
chr2:83587068-83587434	1
chr2:83580299-83580665	1
chr6:117334771-117335122	1
chr1:34351017-34351369	1
chr1:34347457-34347809	1
chrX:99901575-99901912	1
chr8:105001230-105001609	1
chr8:105008132-105008511	1
chr3:123475782-123476134	1
chr13:83419010-83419379	1
chr13:83425767-83426137	1
chr7:9082735-9083104	1
chr7:9075990-9076359	1
chr3:123471762-123472114	1
chr5:45395427-45395780	1
chr5:45399591-45399944	1
chrX:91894851-91895202	1
chrX:91901526-91901877	1
chr1:55778362-55778731	1
chr1:55782911-55783280	1
chr14:80627367-80627737	1
chr14:80622601-80623017	1
chr2:151211689-151212041	1
chr2:151204968-151205320	1
chr12:80424061-80424412	1
chrX:117800014-117800365	1
chr5:57024444-57024813	1
chr5:57017711-57018080	1
chr13:111700456-111700822	1
chr10:34741825-34742177	1
chr10:34748574-34748926	1
chr12:80417263-80417614	1
chr13:111694235-111694601	1
chr9:74633755-74634107	1
chr13:115965192-115965543	1
chr7:77219400-77219752	1
chrX:152901419-152901771	1
chr14:32393271-32393623	1
chrX:152894691-152895043	1
chr2:55873911-55874263	1
chr7:77212663-77213015	1
chr8:63746200-63746552	1
chr14:32400005-32400357	1
chr13:108002659-108003066	1
chr13:107997695-107998102	1
chr15:12062672-12063093	1
chr15:12055931-12056352	1
chr2:17752307-17752754	1
chr15:9813312-9813731	1
chr3:116817539-116818019	1
chr3:116822537-116823017	1
chr12:94036431-94036861	1
chr12:94043336-94043766	1
chr11:108404043-108404445	1
chr11:108399209-108399610	1
chr2:153777900-153778301	1
chr10:112053514-112053900	1
chr5:85073875-85074258	1
chr5:85080791-85081174	1
chr2:87769339-87769740	1
chr12:65807986-65808322	1
chr12:65801250-65801586	1
chr8:120199364-120199716	1
chr8:120192591-120192943	1
chr3:68732548-68732884	1
chr3:68739300-68739651	1
chr11:121074494-121074906	1
chr2:63302395-63302748	1
chr2:63297375-63297728	1
chr7:142214896-142215248	1
chr7:142220391-142220743	1
chr4:38905908-38906246	1
chr4:38912629-38912967	1
chr4:38876858-38877194	1
chr4:38870095-38870431	1
chr5:64557961-64558313	1
chr5:64564710-64565062	1
chrX:113910391-113910743	1
chrX:113915231-113915583	1
chr6:10716414-10716751	1
chr6:10711565-10711902	1
chr4:117198859-117199211	1
chr4:117192125-117192477	1
chr9:74640495-74640847	1
chr2:3567797-3568207	1
chr13:7955890-7956242	1
chrX:126143561-126143928	1
chrX:126150312-126150679	1
chr11:108649900-108650302	1
chr11:108654836-108655238	1
chr15:22756361-22756699	1
chr15:22751493-22751831	1
chr1:152667765-152668150	1
chr1:152662876-152663261	1
chr2:46579163-46579550	1
chr2:46574320-46574707	1
chr16:70547394-70547794	1
chr16:70542446-70542846	1
chr12:108079292-108079649	1
chr12:108084064-108084421	1
chr10:96157222-96157595	1
chr10:96162071-96162444	1
chr12:54289548-54289975	1
chr3:51239968-51240386	1
chr3:51244883-51245301	1
chr3:115914052-115914440	1
chr3:115909128-115909516	1
chr2:177604476-177604824	1
chr2:177609437-177609785	1
chr3:73738090-73738438	1
chr3:73733184-73733532	1
chr1:104294467-104294815	1
chr1:104289578-104289926	1
chr10:65950767-65951168	1
chr10:65955787-65956188	1
chrX:96347811-96348192	1
chrX:96352632-96353013	1
chr8:13710411-13710780	1
chr8:13715388-13715757	1
chr15:37092041-37092456	1
chr15:37097008-37097423	1
chr9:39893600-39894017	1
chr9:39898477-39898894	1
chr11:115754899-115755251	1
chr11:115761649-115762001	1
chr2:36014553-36014889	1
chr2:36018903-36019239	1
chr8:94621486-94621872	1
chr5:12169157-12169493	1
chr5:12164306-12164642	1
chr8:94616512-94616898	1
chr2:105557907-105558261	1
chr2:105562678-105563032	1
chr8:13724006-13724342	1
chr8:13719305-13719641	1
chr4:52891992-52892342	1
chr9:73296323-73296741	1
chr8:128552680-128553084	1
chr8:128557590-128557994	1
chr11:22335225-22335609	1
chr11:22340152-22340536	1
chr9:90857333-90857702	1
chr14:78789538-78789873	1
chr14:78784640-78784975	1
chr9:90864095-90864464	1
chr2:166812199-166812545	1
chr2:166817120-166817469	1
chr4:52887223-52887573	1
chr2:148415536-148415872	1
chr2:148410607-148410943	1
chr1:192155481-192155833	1
chr13:111072762-111073180	1
chr13:111067737-111068155	1
chr3:68114457-68114793	1
chr4:135455804-135456140	1
chr2:3488408-3488773	1
chr2:3483514-3483879	1
chr11:74545010-74545396	1
chr11:74540177-74540563	1
chr3:96494203-96494539	1
chr1:120570872-120571208	1
chr8:102009943-102010279	1
chr14:37235917-37236253	1
chr14:37229198-37229534	1
chr5:16284912-16285248	1
chr1:127891985-127892383	1
chr1:127896856-127897254	1
chr3:159225906-159226242	1
chr3:67029831-67030181	1
chr8:27471353-27471689	1
chrX:79688367-79688799	1
chrX:79693420-79693852	1
chr10:104819451-104819840	1
chr10:104824453-104824842	1
chr9:3466120-3466472	1
chr9:3461294-3461646	1
chr16:58650318-58650654	1
chr11:109730182-109730570	1
chr3:13826147-13826536	1
chr3:13821264-13821653	1
chr15:20972855-20973207	1
chr6:71960385-71960760	1
chr6:71955427-71955802	1
chr1:62534043-62534470	1
chr1:62540867-62541294	1
chr14:124684434-124684887	1
chr14:124691360-124691813	1
chr1:48093937-48094289	1
chr1:48089001-48089474	1
chr11:12507309-12507645	1
chr13:28131154-28131490	1
chr13:63222778-63223147	1
chr13:63218001-63218370	1
chr8:72232614-72232950	1
chr8:72228229-72228565	1
chr5:133949442-133949841	1
chr5:96485499-96485896	1
chr5:96490296-96490688	1
chr3:104594994-104595397	1
chr3:104588190-104588593	1
chr14:108174425-108174880	1
chr14:108169412-108169867	1
chr3:26346858-26347272	1
chr11:29129441-29129777	1
chrX:8517847-8518183	1
chr4:135462541-135462877	1
chr3:68119260-68119596	1
chr5:57696247-57696583	1
chr11:29124557-29124893	1
chr2:138039919-138040288	1
chr2:138035086-138035455	1
chrX:8522726-8523062	1
chr5:57691368-57691704	1
chr10:31095429-31095825	1
chr10:31088569-31088965	1
chr8:55551697-55552033	1
chr8:55546781-55547117	1
chr5:133954408-133954807	1
chr1:76777646-76778011	1
chr5:16291645-16291981	1
chr7:79337066-79337567	1
chr7:79342095-79342596	1
chr5:47970990-47971326	1
chr17:69537018-69537404	1
chr17:69541896-69542282	1
chr5:47966168-47966504	1
chr13:114622204-114622600	1
chr5:105729046-105729395	1
chr13:114627088-114627484	1
chrX:98110824-98111194	1
chr10:90324629-90324963	1
chr10:90329397-90329731	1
chr13:51990363-51990744	1
chr13:51985482-51985863	1
chr1:26354037-26354373	1
chr13:87348935-87349271	1
chr1:160815898-160816234	1
chr7:104273612-104273963	1
chr13:99818234-99818585	1
chrX:98105803-98106217	1
chr13:99822601-99822952	1
chr7:104266843-104267194	1
chr2:98796631-98797018	1
chr4:111838594-111838930	1
chr2:98801506-98801893	1
chr16:82237919-82238255	1
chr10:83792247-83792599	1
chr6:139136921-139137257	1
chr10:83787476-83787828	1
chr4:101128884-101129220	1
chrX:33209420-33209756	1
chr1:26349185-26349521	1
chr4:111833839-111834175	1
chrX:155849218-155849554	1
chr13:87353781-87354117	1
chrX:33214336-33214672	1
chr10:124610584-124610937	1
chr10:124605758-124606111	1
chr13:28124421-28124757	1
chrX:155855952-155856288	1
chrX:4458511-4458847	1
chrX:4463417-4463753	1
chr7:129566351-129566703	1
chr7:129559568-129559920	1
chr16:12976328-12976733	1
chr16:12981206-12981611	1
chr6:4363022-4363403	1
chr6:4367936-4368317	1
chr15:20977814-20978166	1
chr17:65154721-65155057	1
chr1:76773342-76773707	1
chr9:98766410-98766746	1
chr9:122401677-122402013	1
chrX:143172605-143172941	1
chr9:122408404-122408740	1
chr8:126413656-126413992	1
chr8:126418473-126418809	1
chrX:143179332-143179668	1
chr16:53571482-53571835	1
chr5:105724154-105724503	1
chr1:110333924-110334260	1
chr1:110329116-110329452	1
chr17:6344863-6345212	1
chr10:105672602-105673005	1
chr10:105677530-105677933	1
chr17:6349681-6350030	1
chr7:89573431-89573767	1
chr7:89568598-89568934	1
chr4:101124054-101124390	1
chr16:58655142-58655478	1
chr9:10193305-10193711	1
chr9:10198269-10198675	1
chr11:51665046-51665382	1
chr11:51669882-51670218	1
chr16:82242739-82243075	1
chr1:160820690-160821026	1
chr6:139141708-139142044	1
chr3:67027943-67028293	1
chr11:12512264-12512600	1
chr8:102004918-102005254	1
chr17:65161457-65161793	1
chr3:96489248-96489584	1
chr3:159230755-159231091	1
chr1:120575672-120576008	1
chr1:142356288-142356640	1
chr7:91283541-91283891	1
chr1:142361030-142361382	1
chr1:38704800-38705206	1
chr16:50914682-50915127	1
chr16:50909736-50910181	1
chr1:38708606-38709012	1
chr3:106324655-106325022	1
chr7:94983439-94983849	1
chr7:94988366-94988776	1
chr1:109128676-109129027	1
chr7:91280649-91280999	1
chr9:44365229-44365696	1
chr1:109133580-109133931	1
chr4:41454735-41455133	1
chr4:41459602-41460000	1
chr2:17612542-17612909	1
chr2:17617560-17617927	1
chr8:21670901-21671336	1
chr8:21675947-21676382	1
chr7:118273208-118273558	1
chr8:16795188-16795573	1
chr8:16790177-16790562	1
chr7:118268459-118268809	1
chr15:86312264-86312614	1
chr15:86317243-86317593	1
chr10:112058012-112058398	1
chr10:99103075-99103428	1
chr10:99098193-99098546	1
chr2:151179223-151179575	1
chr2:151183681-151184033	1
chr7:3764037-3764390	1
chr8:18579709-18580058	1
chr1:6172461-6172813	1
chr1:6168110-6168462	1
chr4:117696181-117696532	1
chr9:19725042-19725393	1
chr9:19720569-19720920	1
chr3:34853179-34853530	1
chr3:34846430-34846781	1
chr19:39606743-39607094	1
chr19:39599918-39600269	1
chr2:161368828-161369180	1
chr13:9439542-9439894	1
chr2:161375711-161376063	1
chr13:9432659-9433011	1
chr7:106314240-106314591	1
chr7:106309805-106310156	1
chr19:39387921-39388318	1
chr13:115971937-115972288	1
chr19:39381141-39381538	1
chr7:4199883-4200236	1
chr15:4852041-4852436	1
chr15:4858822-4859217	1
chr19:55001188-55001539	1
chr9:98683198-98683549	1
chr13:11507779-11508145	1
chr13:11501098-11501464	1
chrX:119682641-119682991	1
chr1:56778952-56779288	1
chr10:56727508-56727873	1
chr13:98330050-98330446	1
chr11:63467717-63468128	1
chr13:5278077-5278428	1
chr19:15839388-15839800	1
chr19:15846176-15846588	1
chr13:45011153-45011504	1
chr3:84149192-84149605	1
chr3:84142382-84142795	1
chr6:55022353-55022706	1
chr6:55026819-55027172	1
chr1:54618960-54619356	1
chr3:148750097-148750512	1
chr3:148756897-148757312	1
chr9:76738925-76739276	1
chr9:89067789-89068260	1
chr13:79903558-79903909	1
chr9:89074635-89075106	1
chr17:37954007-37954358	1
chr17:37960723-37961074	1
chr5:71576507-71576858	1
chr15:23247113-23247464	1
chr6:13773574-13773925	1
chr6:13766841-13767192	1
chr12:68621713-68622139	1
chr12:68628523-68628949	1
chr1:148274103-148274565	1
chr1:148279145-148279607	1
chr17:65461764-65462115	1
chr17:65468501-65468852	1
chr8:22551168-22551538	1
chr8:22557923-22558293	1
chr1:103038424-103038793	1
chr1:103031666-103032035	1
chr3:71631528-71631923	1
chr3:25421077-25421447	1
chr3:25416848-25417218	1
chr9:71424435-71424802	1
chr9:71431169-71431536	1
chr2:101146344-101146712	1
chr2:101153085-101153453	1
chr14:9051686-9052054	1
chr14:9044947-9045315	1
chr1:194653824-194654190	1
chr1:144861423-144861794	1
chr1:144854675-144855046	1
chr7:3770790-3771142	1
chr5:38130344-38130695	1
chr5:38134336-38134687	1
chr16:80287828-80288194	1
chr16:80294570-80294936	1
chr2:124805687-124806083	1
chr3:133130376-133130726	1
chr3:133123663-133124013	1
chrX:12231401-12231784	1
chrX:12238159-12238542	1
chr12:41370274-41370627	1
chr12:41363544-41363897	1
chrX:58365396-58365792	1
chrX:58358608-58359004	1
chr16:15196154-15196535	1
chr13:114543285-114543679	1
chr13:114538983-114539377	1
chr7:24578166-24578516	1
chr7:24583780-24584130	1
chr2:41751103-41751453	1
chr2:41744370-41744720	1
chrX:137968001-137968351	1
chrX:137963594-137963944	1
chr11:19566137-19566533	1
chr11:19570183-19570579	1
chr5:37928729-37929080	1
chr4:75303210-75303561	1
chr18:6372016-6372367	1
chr16:77116958-77117384	1
chr16:77121414-77121840	1
chr11:15227689-15228085	1
chr11:15234467-15234863	1
chr9:12773892-12774243	1
chr9:12768262-12768613	1
chr6:65384827-65385179	1
chr1:56772249-56772585	1
chr11:63474495-63474891	1
chr13:45017886-45018237	1
chr15:73087601-73087952	1
chr14:104589370-104589721	1
chr13:98326028-98326424	1
chr2:8528454-8528836	1
chr2:8535222-8535604	1
chr1:149514280-149514649	1
chr1:149521028-149521397	1
chr18:21261771-21262121	1
chr18:21268518-21268885	1
chrX:119675899-119676250	1
chr19:55983481-55983830	1
chr16:32195538-32195888	1
chr9:8628270-8628636	1
chr9:8633240-8633606	1
chr6:128911451-128911817	1
chr6:128904551-128904917	1
chr7:11058283-11058647	1
chr7:11054281-11054645	1
chr1:11887116-11887466	1
chr1:11891327-11891677	1
chr2:86339747-86340098	1
chr12:111388207-111388574	1
chr10:83670922-83671272	1
chr10:83677647-83677997	1
chr2:163789026-163789376	1
chr12:111393051-111393418	1
chr2:163795756-163796106	1
chr11:27956690-27957058	1
chr2:124798918-124799314	1
chr5:37924353-37924704	1
chr19:54994968-54995319	1
chr4:75309854-75310205	1
chr15:73081412-73081763	1
chr11:9714717-9715068	1
chr11:9707986-9708337	1
chr11:27951068-27951436	1
chr10:56720751-56721116	1
chr7:82737137-82737489	1
chr7:82741547-82741899	1
chr2:55867186-55867538	1
chr8:63739451-63739803	1
chr10:116606260-116606612	1
chr13:7949141-7949493	1
chr18:85382407-85382789	1
chr18:85377914-85378296	1
chr7:53677353-53677752	1
chr7:53682781-53683165	1
chr13:21636558-21636909	1
chr13:21629818-21630169	1
chr10:57137702-57138054	1
chr10:57144427-57144779	1
chr18:90113512-90113896	1
chr16:32199990-32200340	1
chr3:111598186-111598569	1
chr3:111604799-111605182	1
chr15:43335529-43335899	1
chr15:43330619-43330989	1
chr2:88178711-88179107	1
chr2:88171954-88172352	1
chr16:51093896-51094247	1
chr16:51087177-51087528	1
chr17:17478437-17478805	1
chr17:17472791-17473159	1
chr16:81071674-81072152	1
chr16:81078629-81079107	1
chr7:26911392-26911796	1
chr6:101138357-101138757	1
chr6:101143374-101143774	1
chrX:115549816-115550166	1
chrX:115556576-115556926	1
chr13:120231398-120231748	1
chr13:120224503-120224853	1
chr2:95069699-95070113	1
chr2:95064768-95065182	1
chr7:119412731-119413066	1
chr7:119417584-119417919	1
chr5:6184073-6184465	1
chr5:6190985-6191390	1
chr14:7357405-7357808	1
chr14:7352450-7352853	1
chrX:62077760-62078110	1
chrX:62084623-62084973	1
chr8:18575239-18575588	1
chr9:44372118-44372588	1
chr10:78025224-78025621	1
chr10:78020226-78020623	1
chr1:126424025-126424411	1
chr1:126429308-126429694	1
chr3:85622282-85622635	1
chr2:126971752-126972105	1
chr18:60533322-60533722	1
chr18:60528368-60528768	1
chr3:85629038-85629391	1
chr2:126965003-126965356	1
chr3:69637940-69638308	1
chr3:69644707-69645075	1
chr10:31754521-31754890	1
chr10:31750122-31750491	1
chr5:80058215-80058566	1
chr5:80062195-80062546	1
chr13:32942952-32943319	1
chr19:55976770-55977119	1
chr14:104582618-104582969	1
chr18:90118091-90118475	1
chr13:5283691-5284042	1
chr5:94804545-94804897	1
chr9:110970449-110970867	1
chr9:110975448-110975866	1
chrX:152963078-152963463	1
chr12:31364874-31365225	1
chr15:44658687-44659038	1
chr13:81890978-81891329	1
chr13:81897708-81898059	1
chr14:10185510-10185861	1
chr14:10178766-10179117	1
chr9:87491626-87491976	1
chr9:87498354-87498704	1
chr10:80976038-80976389	1
chr10:80980501-80980852	1
chr5:82875938-82876290	1
chr5:82882772-82883124	1
chr11:22577701-22578078	1
chr15:23240383-23240734	1
chr11:22582652-22583033	1
chr3:117385899-117386250	1
chr6:73219452-73219804	1
chr6:73212711-73213063	1
chr3:117379169-117379520	1
chr16:79943076-79943488	1
chr3:64657558-64657926	1
chr3:64661737-64662105	1
chr16:79948079-79948491	1
chr16:12332970-12333322	1
chr16:12337345-12337697	1
chr4:51894695-51895115	1
chr4:51899659-51900079	1
chr17:8215851-8216336	1
chr17:8222792-8223277	1
chr9:123742717-123743069	1
chr9:123749458-123749810	1
chr11:90901728-90902079	1
chr11:90907907-90908258	1
chr1:108038803-108039154	1
chr2:93824781-93825132	1
chr1:108040539-108040890	1
chr4:98524868-98525217	1
chr4:98531607-98531956	1
chr17:84882928-84883329	1
chr17:84887423-84887824	1
chr2:93831505-93831856	1
chr13:4338465-4338816	1
chr7:124811471-124811822	1
chr7:124806698-124807049	1
chr13:33862034-33862385	1
chr13:4345213-4345564	1
chr13:33868768-33869119	1
chr8:94799745-94800113	1
chr8:94795266-94795634	1
chr8:61367022-61367373	1
chr8:61371175-61371526	1
chr4:42028088-42028458	1
chr4:42461862-42462232	1
chr4:42384268-42384638	1
chr4:42032057-42032427	1
chr4:42465831-42466201	1
chr4:42380299-42380669	1
chr8:25871456-25871809	1
chr8:25878187-25878540	1
chr15:59519003-59519388	1
chr5:105419336-105419718	1
chr5:105424324-105424706	1
chr10:107999500-107999885	1
chr10:108006259-108006644	1
chr6:145489051-145489402	1
chr6:145493020-145493371	1
chr4:75623588-75623956	1
chr4:75616838-75617206	1
chrX:162985390-162985757	1
chrX:162978633-162979000	1
chr7:107271138-107271489	1
chr7:107264410-107264761	1
chr2:35526248-35526597	1
chr17:68766176-68766558	1
chr13:52294545-52294912	1
chr13:52289519-52289886	1
chr5:77566391-77566757	1
chr5:77559629-77559995	1
chrX:126179502-126179868	1
chrX:126174969-126175335	1
chr7:60769747-60770113	1
chr7:60762916-60763282	1
chr14:42782342-42782707	1
chr16:83367537-83367903	1
chr16:83360716-83361082	1
chrX:3709109-3709509	1
chr18:46439095-46439530	1
chr18:46443547-46443982	1
chr15:36995566-36995949	1
chr5:60808641-60809040	1
chr5:60803639-60804038	1
chr1:139729725-139730125	1
chr1:139724769-139725169	1
chr7:21406067-21406483	1
chr7:21412938-21413354	1
chr4:62578680-62579094	1
chr4:62573624-62574038	1
chr8:6987441-6987855	1
chr8:6982438-6982852	1
chrX:3704117-3704517	1
chr13:117295789-117296155	1
chr14:64463380-64463808	1
chr14:64468287-64468715	1
chr1:103588714-103589098	1
chr1:103593683-103594067	1
chr16:34582307-34582726	1
chr16:34589138-34589557	1
chr2:151340724-151341203	1
chr2:151333833-151334312	1
chr13:103936885-103937283	1
chr13:103929945-103930343	1
chr5:7944885-7945234	1
chr5:7938036-7938385	1
chr19:57832122-57832504	1
chr19:57827109-57827491	1
chr4:39957854-39958367	1
chr4:39952759-39953272	1
chr12:82466025-82466446	1
chr12:82461019-82461440	1
chr6:31002083-31002488	1
chr7:12547510-12547926	1
chrX:54232214-54232630	1
chr7:12542609-12543025	1
chrX:54227201-54227617	1
chr13:77610681-77611112	1
chr11:90829508-90829978	1
chr11:90834464-90834934	1
chr9:83942548-83942963	1
chr9:83949453-83949868	1
chr12:68750022-68750451	1
chr12:68745177-68745606	1
chr13:56712881-56713231	1
chr18:28965281-28965686	1
chr18:28960239-28960644	1
chr4:119652541-119652924	1
chr4:119643763-119644146	1
chr6:132502252-132502670	1
chr6:132495379-132495797	1
chr17:13413422-13413840	1
chr17:13418420-13418838	1
chr2:172750598-172750999	1
chr2:172743742-172744143	1
chr1:116648266-116648630	1
chrX:81760454-81760841	1
chrX:81765503-81765890	1
chr1:148490355-148490721	1
chr1:148485456-148485822	1
chr8:101360606-101360972	1
chr13:117302621-117302987	1
chr14:119963019-119963408	1
chr8:101365518-101365884	1
chr1:116655028-116655392	1
chr7:26904468-26904872	1
chr8:121405292-121405674	1
chr8:121412155-121412537	1
chr5:22201036-22201418	1
chr5:22206050-22206432	1
chrX:81646650-81647084	1
chrX:81651633-81652067	1
chr6:18762409-18762809	1
chr6:18757495-18757896	1
chr3:51616183-51616598	1
chr3:51623143-51623558	1
chr8:24774230-24774596	1
chr16:33852203-33852588	1
chr16:33847238-33847622	1
chr17:50078422-50078819	1
chr14:113288096-113288491	1
chr14:113292985-113293380	1
chr8:46345386-46345782	1
chr8:46350409-46350805	1
chr1:114185221-114185638	1
chr1:114190140-114190557	1
chr5:127742448-127742867	1
chr5:83586126-83586545	1
chr5:83591182-83591601	1
chr9:11797901-11798253	1
chr4:74927159-74927561	1
chr2:145630250-145630634	1
chr9:11792944-11793296	1
chr4:74932204-74932606	1
chr2:145625239-145625623	1
chr7:83923657-83924058	1
chr7:83928582-83928983	1
chr10:24691232-24691614	1
chr10:24686431-24686813	1
chr10:84749538-84749943	1
chr10:84744590-84744995	1
chr6:149269303-149269639	1
chr5:7492598-7492985	1
chr5:7494387-7494774	1
chr9:98771359-98771695	1
chr8:27464634-27464970	1
chr4:68120371-68120758	1
chr4:68115401-68115788	1
chr19:52985551-52985973	1
chr19:52990524-52990946	1
chr16:11684918-11685308	1
chr16:11680014-11680404	1
chr3:26353703-26354117	1
chr6:149274206-149274542	1
chr8:23550517-23550972	1
chr16:89447839-89448266	1
chr4:111571749-111572175	1
chr16:53576185-53576573	1
chr4:111576730-111577156	1
chr16:89442909-89443336	1
chr8:23545574-23546029	1
chr17:89942316-89942692	1
chr17:89935555-89935918	1
chr8:29515487-29515823	1
chr8:29520303-29520639	1
chr13:111499655-111500052	1
chr13:111506237-111506634	1
chr3:75423630-75424014	1
chr3:75418675-75419061	1
chr2:17747338-17747785	1
chr13:4069558-4069909	1
chr2:35519525-35519874	1
chr8:24767413-24767779	1
chr11:26555446-26555829	1
chr11:26560401-26560784	1
chr7:137894370-137894771	1
chr7:137899410-137899811	1
chr16:80309326-80309692	1
chr16:80304395-80304761	1
chr1:163692968-163693336	1
chr15:36996973-36997358	1
chr13:115889062-115889524	1
chr13:115896042-115896504	1
chr9:121024682-121025095	1
chr9:121029063-121029476	1
chr7:51419088-51419484	1
chr7:51424089-51424485	1
chr14:42775516-42775881	1
chr7:128609604-128610061	1
chr7:128604606-128605063	1
chr1:69703041-69703458	1
chr1:69698002-69698419	1
chr16:31578687-31579069	1
chr7:121850861-121851281	1
chr7:121855577-121855997	1
chr1:140823569-140823969	1
chr1:140816761-140817161	1
chr10:33890693-33891093	1
chr10:33886786-33887186	1
chr12:8408077-8408459	1
chr5:143427241-143427623	1
chrX:120976659-120977113	1
chrX:120983553-120984007	1
chr7:138266634-138267050	1
chr7:138261748-138262164	1
chr14:78339697-78340113	1
chr3:61274422-61274850	1
chr3:61269395-61269823	1
chr17:75902310-75902722	1
chr6:139826049-139826481	1
chr17:75897397-75897809	1
chr8:47088906-47089305	1
chr6:139830944-139831376	1
chr8:47084063-47084462	1
chr12:8403176-8403558	1
chr5:143432142-143432524	1
chr14:78334758-78335174	1
chr19:33373400-33373782	1
chr9:58785303-58785685	1
chr9:58778377-58778759	1
chr14:119956083-119956591	1
chr7:138688946-138689342	1
chr7:138695840-138696236	1
chr17:39275046-39275397	1
chr17:39271065-39271416	1
chr18:6375984-6376335	1
chr9:98677606-98677957	1
chr12:31358158-31358509	1
chr13:4066230-4066580	1
chrX:152967589-152967974	1
chr2:111860994-111861392	1
chr10:54588775-54589126	1
chr2:111866005-111866403	1
chr10:54593157-54593508	1
chr5:73459128-73459480	1
chr5:73466020-73466372	1
chrX:151578148-151578498	1
chr11:64797024-64797453	1
chr11:64792045-64792474	1
chr4:98454410-98454761	1
chr2:86346474-86346825	1
chrX:151584882-151585232	1
chr6:65391555-65391907	1
chr6:98817413-98817763	1
chr15:54187587-54187958	1
chr6:98824233-98824583	1
chr15:54180832-54181203	1
chr11:61427212-61427579	1
chr11:61420369-61420736	1
chr15:44654285-44654636	1
chr6:59697846-59698196	1
chr6:59692916-59693337	1
chr16:71785563-71785915	1
chr1:110937609-110937961	1
chr1:110942087-110942439	1
chr16:71792314-71792666	1
chr1:89199074-89199461	1
chr1:89202872-89203259	1
chr13:86777649-86778048	1
chr13:86772656-86773055	1
chr8:113287183-113287533	1
chr8:113280368-113280718	1
chr5:129437441-129437873	1
chr5:129442441-129442873	1
chr9:32839312-32839679	1
chr9:32846144-32846511	1
chr5:124110598-124110948	1
chr5:124104495-124104845	1
chr17:51864438-51864790	1
chr2:21081669-21082019	1
chr2:21074942-21075292	1
chr11:55240927-55241294	1
chr11:55247663-55248030	1
chr10:21216206-21216556	1
chr10:21211206-21211556	1
chr5:92476106-92476462	1
chr5:92481742-92482098	1
chr7:85933143-85933495	1
chr7:85926414-85926766	1
chr11:74226390-74226742	1
chr11:74219693-74220045	1
chr11:73740444-73740809	1
chr11:73735958-73736323	1
chr13:62479769-62480149	1
chrX:75586519-75586871	1
chrX:75582186-75582538	1
chr17:38272252-38272604	1
chr17:38267794-38268146	1
chr6:14085044-14085397	1
chr6:14091873-14092226	1
chr8:8320282-8320671	1
chr8:8315261-8315664	1
chr1:115885258-115885726	1
chr1:115890236-115890704	1
chr11:110019644-110020057	1
chr11:110024045-110024458	1
chr4:122217307-122217711	1
chr4:122212784-122213188	1
chr1:53134416-53134805	1
chr1:53129587-53129976	1
chr2:74371203-74371573	1
chr2:74364451-74364821	1
chr6:68283286-68283658	1
chr6:68290029-68290401	1
chr11:116785594-116785961	1
chr11:116792337-116792704	1
chr5:3185325-3185678	1
chr5:3180451-3180804	1
chr2:107600792-107601145	1
chr2:107594053-107594406	1
chr13:62472990-62473370	1
chr14:85895839-85896207	1
chr14:85889096-85889464	1
chr1:19629201-19629572	1
chr1:19622356-19622727	1
chrX:99908350-99908702	1
chrX:19661688-19662040	1
chrX:19668463-19668815	1
chr10:40759673-40760037	2
chrY:61601577-61601933	2
chrY:48811320-48811676	2
chrY:76716426-76716782	2
chrY:68877580-68877936	2
chrY:48804350-48804698	2
chrY:61594607-61594955	2
chrY:68884427-68884775	2
chrY:76709587-76709935	2
chr6:22171246-22171604	2
chr6:22174018-22174376	2
chrY:31333668-31334033	2
chrY:33206863-33207228	2
chr2:155127895-155128260	2
chrY:31340559-31340924	2
chr2:155121075-155121440	2
chrY:33213754-33214119	2
chrY:3342236-3342600	2
chrY:3335316-3335680	2
chr1:66024488-66024851	2
chr1:66017612-66017975	2
chr2:155538451-155538811	2
chr8:89918029-89918392	2
chr8:89924914-89925277	2
chr12:24395370-24395733	2
chr12:24402237-24402600	2
chr12:17122156-17122521	2
chr12:17128990-17129355	2
chrY:2783892-2784257	2
chrY:2777046-2777411	2
chr10:99345882-99346247	2
chr10:99339039-99339404	2
chrY:2874404-2874769	2
chrY:2881250-2881615	2
chr3:106003602-106003967	2
chr6:123684194-123684558	2
chr6:123677373-123677737	2
chr1:111253620-111253986	2
chr1:111260353-111260719	2
chr8:50597186-50597550	2
chr8:50604025-50604389	2
chr16:88797468-88797832	2
chr16:88790638-88791002	2
chrX:160292423-160292787	2
chrX:160285595-160285959	2
chr3:4718311-4718677	2
chr3:4725143-4725509	2
chr1:87133920-87134286	2
chr1:87140483-87140849	2
chr17:68303570-68303935	2
chr17:68296668-68297033	2
chr3:5517752-5518116	2
chr3:5524568-5524932	2
chr1:127558258-127558624	2
chr1:127565118-127565484	2
chr17:87749049-87749414	2
chr17:87753631-87753996	2
chr5:46940521-46940888	2
chr5:46947383-46947750	2
chr6:117592055-117592419	2
chr3:42820233-42820598	2
chr8:102211600-102211964	2
chr3:42827050-42827415	2
chr5:41402099-41402463	2
chr1:26232449-26232814	2
chr5:41395283-41395647	2
chr6:117585316-117585657	2
chr2:80226077-80226444	2
chr2:80230460-80230827	2
chr4:155676613-155676977	2
chr4:155421682-155422048	2
chr5:20183750-20184114	2
chr6:111939838-111940204	2
chr12:6516474-6516840	2
chr4:155683445-155683809	2
chr12:6523313-6523679	2
chr5:98204721-98205087	2
chr5:98211576-98211942	2
chr10:24848312-24848677	2
chr6:111935480-111935844	2
chr13:15431468-15431832	2
chr12:119590723-119591087	2
chr13:15438327-15438691	2
chr15:56175803-56176167	2
chr12:119597555-119597919	2
chr15:56182662-56183026	2
chr5:20190591-20190957	2
chr1:125323607-125323972	2
chr1:125316764-125317129	2
chr9:120633981-120634346	2
chr9:120640879-120641244	2
chr16:79375606-79375970	2
chr10:129395751-129396115	2
chr14:83866071-83866435	2
chr14:83873657-83874021	2
chr14:83869864-83870228	2
chr16:79368699-79369060	2
chr18:3047628-3047992	2
chr18:3051469-3051833	2
chr9:13069371-13069732	2
chr3:28062745-28063106	2
chr3:28069606-28069970	2
chr10:129388816-129389180	2
chrX:154818414-154818775	2
chrX:154822203-154822567	2
chr11:65458668-65459023	2
chr6:14466722-14467090	2
chr6:14459841-14460207	2
chr11:65451780-65452144	2
chr3:132049096-132049457	2
chr9:119862351-119862719	2
chr6:3291639-3291997	2
chr9:123197843-123198207	2
chr6:95475553-95475917	2
chr9:123190840-123191195	2
chr9:119869274-119869640	2
chr17:21345727-21346085	2
chr17:21338827-21339185	2
chr7:23476854-23477211	2
chr11:88917879-88918245	2
chr11:88910955-88911321	2
chr6:140326470-140326834	2
chr6:140322080-140322444	2
chr4:143644880-143645237	2
chr4:143651702-143652059	2
chr5:43835722-43836087	2
chr5:43828841-43829197	2
chr14:81087850-81088216	2
chr14:81094667-81095031	2
chr4:118190219-118190584	2
chr3:11124017-11124381	2
chr4:118183360-118183725	2
chr3:11130894-11131258	2
chr3:140120010-140120363	3
chr3:140124941-140125294	3
chrX:127935870-127936222	3
chrX:127940804-127941156	3
chrX:22563934-22564310	3
chrX:22570729-22571105	3
chr18:47653603-47653954	3
chr1:149506292-149506642	3
chr1:149513104-149513454	3
chrX:121439088-121439438	3
chrX:121445869-121446219	3
chr15:74367542-74367892	3
chr18:47648754-47649105	3
chr15:74360732-74361082	3
chr18:11630960-11631311	3
chr18:11626061-11626412	3
chr6:87408906-87409255	3
chr6:87402099-87402448	3
chr1:142589800-142590150	3
chr1:142584892-142585242	3
chr12:52734956-52735309	3
chr18:66750100-66750491	3
chrY:42508630-42509008	3
chrY:42513540-42513918	3
chr18:66755023-66755414	3
chr18:83707427-83707778	3
chr18:83700646-83700997	3
chr8:3345071-3345421	3
chr2:177163397-177163747	3
chr2:177156595-177156945	3
chr8:3338288-3338638	3
chr3:82487628-82488004	3
chr3:82480794-82481170	3
chr17:45644647-45644996	3
chr17:45649571-45649920	3
chr4:102882484-102882834	3
chr4:102875662-102876012	3
chr12:52730105-52730458	3
chr1:108408855-108409218	3
chr1:108415675-108416038	3
chr7:137415019-137415398	3
chr7:137419902-137420281	3
chr17:80853945-80854298	3
chr17:80860724-80861077	3
chr1:178064777-178065126	3
chr1:178058028-178058377	3
chr1:126944029-126944382	3
chr1:126939172-126939525	3
chr1:87466911-87467259	3
chr6:10689580-10689928	3
chr1:87460131-87460479	3
chr6:10694458-10694806	3
chrX:89300261-89300612	3
chrX:91816978-91817329	3
chrX:91823760-91824111	3
chrX:89307042-89307393	3
chr2:154354263-154354656	3
chr2:154359199-154359592	3
chr4:78517000-78517354	3
chr4:78512161-78512515	3
chr2:7404073-7404426	3
chr2:7408999-7409352	3
chr13:43277543-43277897	3
chr13:43284302-43284656	3
chr13:97848037-97848417	3
chr13:97852945-97853325	3
chr2:145123355-145123718	3
chr2:145118404-145118767	3
chr1:23301117-23301467	3
chr1:23306006-23306356	3
chr12:56525185-56525535	3
chr2:26333221-26333588	3
chr2:84510087-84510421	3
chr2:84505210-84505544	3
chr3:60494750-60495084	3
chr3:60489873-60490207	3
chr11:116394322-116394709	3
chr11:116389405-116389792	3
chr4:127015336-127015691	3
chr4:127008520-127008875	3
chr6:31804272-31804637	3
chr6:31799370-31799735	3
chr15:77902004-77902357	3
chr15:77895207-77895560	3
chr15:39173041-39173390	3
chr15:39177908-39178257	3
chr13:100593871-100594225	3
chr13:100588952-100589306	3
chr10:59386693-59387060	3
chr10:59381799-59382166	3
chr11:106033194-106033560	3
chr11:106028246-106028612	3
chr6:28924175-28924529	3
chr6:28928999-28929353	3
chr16:36769955-36770352	3
chr16:36765055-36765452	3
chr3:156799543-156799878	3
chr2:72275232-72275599	3
chr2:26338106-26338473	3
chr2:72270362-72270729	3
chr5:143004698-143005048	3
chr5:143009122-143009472	3
chr10:70791385-70791737	4
chr10:70798187-70798539	4
chr17:68948438-68948791	4
chr17:68941634-68941987	4
chr2:167412993-167413346	4
chr2:167408044-167408397	4
chr17:74765910-74766278	4
chr15:90636468-90636819	4
chr15:90643270-90643621	4
chr14:41464402-41464740	4
chr14:41457742-41458080	4
chr17:74759071-74759439	4
chr4:4890332-4890685	4
chr4:4883514-4883867	4
chr14:19005874-19006224	4
chr14:19012669-19013019	4
chr1:46180882-46181236	4
chr7:4455442-4455793	4
chr7:4460351-4460702	4
chr3:84365965-84366316	4
chr3:84359162-84359513	4
chr17:63749053-63749404	4
chr17:63742272-63742623	4
chr10:77950732-77951083	4
chr10:77957534-77957885	4
chr7:30392080-30392433	4
chr17:76519442-76519793	4
chr17:76512662-76513013	4
chr3:54855982-54856333	4
chr3:54849180-54849531	4
chrX:72941953-72942304	4
chrX:72948755-72949106	4
chr13:102833907-102834258	4
chr13:102827105-102827456	4
chr5:145330032-145330383	4
chr5:145336801-145337152	4
chr5:83021160-83021511	4
chr5:83027955-83028306	4
chr7:30385301-30385653	4
chr3:77597375-77597728	4
chr8:119052002-119052356	4
chr8:119045197-119045551	4
chr5:92621422-92621773	4
chr5:92614544-92614895	4
chr18:68419045-68419396	4
chr18:68412244-68412595	4
chr9:88821359-88821709	4
chr9:88828126-88828476	4
chr1:45739002-45739352	4
chr1:45734076-45734426	4
chrY:89125022-89125391	4
chrY:89131814-89132183	4
chr4:147833502-147833852	4
chr4:147840310-147840658	4
chr14:90294649-90295026	4
chr14:90301486-90301863	4

## Sheet: IAPLTR2_Mm
UCSC position	Clade
chr6:146817016-146817458	1
chr12:115971881-115972367	1
chr9:19214872-19215355	1
chr10:15179873-15180357	1
chr18:19384435-19384910	1
chr16:17952539-17953023	1
chr10:39760778-39761270	1
chr16:81025405-81025892	1
chr19:31855773-31856237	1
chr9:17690767-17691243	1
chr15:99106517-99107001	1
chr2:111548218-111548660	1
chr2:111552835-111553277	1
chr1:44295288-44295755	1
chr6:109715975-109716458	1
chr6:120816925-120817386	1
chr6:120812262-120812722	1
chr2:100144440-100144914	1
chrY:17510048-17510568	1
chrY:12796838-12797358	1
chr6:146694246-146694716	1
chr6:146689704-146690174	1
chr2:20253950-20254408	1
chr2:20258466-20258924	1
chrY:2611192-2611663	1
chrY:2605203-2605674	1
chr14:6895290-6895779	1
chr14:65178505-65178957	1
chr14:65183177-65183629	1
chr5:110132641-110133105	1
chr14:29765898-29766363	1
chr14:29761337-29761802	1
chr15:14726853-14727282	1
chr15:14731373-14731802	1
chr15:20154710-20155136	1
chr15:20159358-20159788	1
chr5:109725156-109725642	1
chr5:109729749-109730236	1
chr8:100602161-100602638	1
chr8:100598127-100598530	1
chr8:19671281-19671769	1
chr8:19674598-19675086	1
chr7:11033290-11033727	1
chr17:81231713-81232200	1
chr17:81236238-81236725	1
chr6:129012021-129012503	1
chr3:14241770-14242307	1
chr2:116484185-116484649	1
chr3:14234735-14235272	1
chrX:80562409-80562877	1
chrX:80557716-80558182	1
chr5:75305271-75305734	1
chr5:75309579-75310043	1
chr5:109050988-109051462	1
chr4:122825384-122825860	1
chr12:19610430-19610931	1
chr12:18390684-18391250	1
chr17:33981269-33981698	1
chr4:60413873-60414412	1
chr4:61774171-61774710	1
chr4:60406875-60407353	1
chr4:61767173-61767651	1
chr9:19905539-19906012	1
chr1:112564190-112564663	1
chr1:112568997-112569470	1
chr15:97557084-97557543	1
chr15:97550129-97550588	1
chr12:114633211-114633684	1
chr12:114640188-114640661	1
chr2:12045956-12046427	1
chr3:17954143-17954612	1
chr3:17958651-17959120	1
chr17:72456247-72456697	1
chr17:72449331-72449781	1
chr2:12043201-12043669	1
chr4:152828799-152829256	1
chr10:32936614-32937089	1
chr10:32938810-32939285	1
chr17:77924979-77925469	1
chr17:77920489-77920977	1
chr6:147907881-147908342	1
chr6:147893632-147894093	1
chr6:27129414-27129890	1
chr6:27125426-27125902	1
chrX:17495718-17496192	1
chrX:17504790-17505264	1
chrX:17500254-17500728	1
chr15:60800945-60801425	1
chr15:60807868-60808348	1
chr4:50319800-50320266	1
chr18:56345415-56345866	1
chr18:56340855-56341306	1
chrX:8429473-8429942	1
chr9:92406025-92406503	1
chr9:92408820-92409298	1
chr9:11632504-11632964	1
chrX:157798019-157798487	1
chr10:3320939-3321396	1
chr10:3316244-3316701	1
chr6:57229564-57230022	1
chr2:80732344-80732801	1
chr10:97329277-97329734	1
chr10:97320467-97320922	1
chrX:61753995-61754466	1
chr5:140534474-140534945	1
chr5:140529820-140530291	1
chr5:33332250-33332706	1
chr5:33327785-33328241	1
chr1:110612995-110613452	1
chr6:41563001-41563471	1
chr4:17826926-17827396	1
chr3:138433797-138434254	1
chr16:78448820-78449278	1
chr16:78444709-78445167	1
chr11:19788633-19789089	1
chr11:19793239-19793695	1
chr10:122303528-122303987	1
chr10:122308145-122308604	1
chr4:30228575-30229035	1
chr4:30235495-30235955	1
chr7:62844739-62845198	1
chr7:62840092-62840551	1
chr1:146805793-146806250	1
chr18:17464820-17465278	1
chr18:17469497-17469955	1
chr16:98103168-98103635	1
chr16:98100346-98100813	1
chr19:5406363-5406822	1
chr8:75743133-75743615	1
chr5:151475231-151475711	1
chr5:151470595-151471075	1
chr3:116760415-116760896	1
chr3:116765002-116765483	1
chr16:70270682-70271165	1
chr16:70275216-70275699	1
chr12:58607383-58607842	1
chr15:92722701-92723172	1
chr15:92729693-92730164	1
chr1:146282082-146282557	1
chr1:146288714-146289187	1
chr7:85378258-85378730	1
chrX:168176613-168177092	1
chrX:168181137-168181616	1
chr4:7297684-7298160	1
chr4:7302333-7302812	1
chr14:42320996-42321472	1
chr14:42313953-42314429	1
chrY:40003876-40004349	1
chrY:40008489-40008915	1
chr13:62663970-62664445	1
chr15:34226609-34227084	1
chr8:65924703-65925176	1
chr8:65930165-65930623	1
chr13:62659298-62659773	1
chr12:3062903-3063379	1
chr12:3058269-3058744	1
chr7:85373723-85374195	1
chr18:89615820-89616291	1
chr18:89620400-89620909	1
chr10:18139121-18139597	1
chr12:90564535-90565012	1
chr16:86074711-86075186	1
chr18:45295821-45296307	1
chr18:45291795-45292279	1
chr1:4567176-4567643	1
chr1:4556988-4557455	1
chr15:8552543-8553018	1
chr15:8548039-8548514	1
chr1:21584568-21585044	1
chr1:21581627-21582103	1
chr17:60304723-60305214	1
chr11:71040272-71040739	1
chr11:71044250-71044717	1
chr2:32473360-32473838	1
chr2:32477340-32477818	1
chr2:81460311-81460789	1
chr18:45364307-45364781	1
chr18:45357359-45357833	1
chr16:72451650-72452125	1
chr3:73379458-73379937	1
chr11:16961485-16961958	1
chr8:4858184-4858643	1
chr8:4853714-4854169	1
chr6:105698150-105698619	1
chr6:105700205-105700674	1
chr17:67001131-67001585	1
chr17:67005659-67006105	1
chr10:88967841-88968322	1
chr16:86081292-86081767	1
chr5:86318273-86318748	1
chr19:20459952-20460428	1
chr19:20455471-20455947	1
chr11:18806339-18806820	1
chr11:18813281-18813762	1
chr13:118269010-118269481	1
chr8:82304251-82304758	1
chr17:91481631-91482106	1
chr19:4956908-4957381	1
chr18:58317784-58318258	1
chr18:58322292-58322766	1
chr15:12526774-12527230	1
chr15:12531363-12531819	1
chrY:89303736-89304213	1
chr13:4464219-4464698	1
chr13:4459708-4460187	1
chr10:23726341-23726813	1
chr6:131546218-131546694	1
chr6:131550672-131551148	1
chr15:70910861-70911393	1
chr5:64896199-64896675	1
chr5:64889704-64890180	1
chr12:85003518-85003995	1
chr9:38171138-38171615	1
chr6:148166351-148166826	1
chr6:148170997-148171472	1
chr10:99608762-99609227	1
chr2:134750623-134751108	1
chr10:62612875-62613329	1
chr10:62608889-62609369	1
chr4:89875828-89876305	1
chr7:144349562-144350042	1
chr7:144354116-144354596	1
chr2:134746658-134747143	1
chr6:16359773-16360283	1
chr6:112436434-112436917	1
chr9:5280112-5280597	1
chr9:5284075-5284560	1
chr14:24412762-24413232	1
chr14:24416722-24417192	1
chr6:61508135-61508615	1
chr6:61512055-61512535	1
chr9:71086303-71086782	1
chr1:121781204-121781683	1
chr1:121777269-121777748	1
chr8:67799731-67800205	1
chr8:67792712-67793186	1
chr2:136278915-136279394	1
chr2:136274444-136274920	1
chr5:64037822-64038297	1
chr5:64030834-64031309	1
chr6:112237583-112238057	1
chr6:112241495-112241969	1
chr7:127625647-127626128	1
chr7:127618673-127619152	1
chr15:59870690-59871171	1
chr15:59874658-59875138	1
chr11:6531473-6531952	1
chr11:6535440-6535919	1
chr9:73900157-73900630	1
chr9:73904175-73904648	1
chr11:79236637-79237105	1
chr11:79232683-79233151	1
chr1:52593791-52594253	1
chr1:52589810-52590335	1
chr11:113173017-113173489	1
chr6:140991002-140991481	1
chr6:140985306-140985785	1
chrY:15899492-15899978	1
chrY:11214093-11214579	1
chrY:86743424-86743914	1
chrY:43772675-43773159	1
chrY:43768162-43768646	1
chr7:39655242-39655724	1
chrY:11209640-11210124	1
chrY:15895039-15895523	1
chr3:133297726-133298207	1
chr3:133301629-133302108	1
chr3:13794725-13795211	1
chr3:13790755-13791241	1
chr1:180612083-180612568	1
chr1:180616053-180616538	1
chr7:8341359-8341836	1
chr7:8348324-8348801	1
chr8:114328695-114329162	1
chr8:114324168-114324635	1
chr2:144631886-144632353	1
chr2:144627896-144628363	1
chrX:118998082-118998570	1
chrY:74729025-74729500	1
chrY:74732576-74733051	1
chr10:99599559-99600037	1
chr4:141210116-141210591	1
chr4:141207607-141208082	1
chr5:23569989-23570466	1
chr5:23572920-23573397	1
chr2:156213915-156214392	1
chr2:156210983-156211460	1
chr6:143886348-143886824	1
chr6:143883424-143883900	1
chr8:91434019-91434499	1
chr8:91431085-91431565	1
chrY:87776737-87777214	1
chrY:87780611-87781088	1
chr2:118557900-118558375	1
chr2:118554766-118555241	1
chr12:25591817-25592293	1
chr12:25594752-25595228	1
chr3:152808415-152808882	1
chr3:152801477-152801944	1
chr5:40478229-40478686	1
chr5:40471273-40471730	1
chrX:95349875-95350341	1
chrX:95354371-95354837	1
chr18:40713130-40713607	1
chr18:40708629-40709106	1
chr13:87374728-87375194	1
chr13:87370775-87371241	1
chr1:93107374-93107839	1
chr1:93111256-93111721	1
chr6:41246769-41247252	1
chr6:41242847-41243330	1
chr2:165679108-165679593	1
chr2:165675188-165675673	1
chr2:97188740-97189209	1
chr2:97184838-97185307	1
chr17:22635650-22636120	1
chr17:22631702-22632172	1
chr6:37464146-37464615	1
chr5:144865450-144865920	1
chr5:144861564-144862033	1
chr5:136204220-136204689	1
chr5:136208122-136208591	1
chr2:6776981-6777461	1
chr2:6773059-6773539	1
chr13:4942653-4943122	1
chr3:136122122-136122594	1
chrX:92254605-92255075	1
chrX:92248376-92248846	1
chr2:89270434-89270917	1
chr2:89264612-89265064	1
chr18:19434375-19434845	1
chr18:19430503-19430973	1
chr8:124124830-124125311	1
chr8:124120288-124120769	1
chr6:132560609-132561095	1
chr6:132556130-132556616	1
chr9:114874101-114874575	1
chr9:114878573-114879047	1
chr5:33759666-33760132	1
chr11:5535476-5535943	1
chr2:16581082-16581556	1
chr2:16585588-16586062	1
chr3:103238991-103239446	1
chr2:123754521-123754992	1
chr15:73377721-73378182	1
chr13:98089732-98090188	1
chr15:73373226-73373691	1
chr13:98082716-98083172	1
chr8:100522513-100522989	1
chr4:115605899-115606374	1
chr2:99545225-99545700	1
chr2:99552174-99552649	1
chr7:97274013-97274480	1
chrX:97141742-97142216	1
chr2:161511655-161512123	1
chr5:55652725-55653200	1
chr5:55657232-55657698	1
chr1:8410688-8411149	1
chr7:97277880-97278355	1
chr15:103606693-103607167	1
chr15:103610600-103611074	1
chr8:100518633-100519107	1
chr9:71082395-71082868	1
chr5:11475614-11476089	1
chr5:11479465-11479940	1
chr8:100167447-100167921	1
chr8:100163545-100164019	1
chr19:20143898-20144373	1
chrX:165666797-165667264	1
chr11:53237232-53237711	1
chr1:166940022-166940493	1
chr3:3869170-3869647	1
chr3:3865237-3865712	1
chr14:110365048-110365523	1
chr17:27264889-27265367	1
chr17:27269463-27269941	1
chr7:57143090-57143576	1
chr7:57139459-57139949	1
chr11:31454364-31454839	1
chr14:86398118-86398596	1
chr11:31447448-31447923	1
chr11:16232309-16232795	1
chr11:16228393-16228879	1
chr4:115281069-115281532	1
chr2:166534614-166535090	1
chr2:166530653-166531129	1
chr2:51886204-51886685	1
chr2:51890104-51890587	1
chr2:123229023-123229501	1
chr2:123225068-123225546	1
chr2:146995678-146996156	1
chr2:147000191-147000669	1
chr2:147004704-147005182	1
chr15:94061975-94062447	1
chr15:94057446-94057918	1
chr4:138327386-138327850	1
chr14:91961040-91961517	1
chr14:91963736-91964213	1
chr5:23379565-23380035	1
chrY:23525355-23525829	1
chrY:23530110-23530585	1
chrY:35752692-35753167	1
chrY:35747940-35748414	1
chrY:81094889-81095364	1
chrY:21882483-21882958	1
chrY:21877728-21878202	1
chrY:81099645-81100119	1
chr6:146711769-146712281	1
chr6:146707211-146707688	1
chr2:156118857-156119318	1
chr2:156114329-156114792	1
chrY:35101780-35102303	1
chrY:69678521-69679044	1
chrY:69391616-69392139	1
chrY:73703152-73703675	1
chrY:82259085-82259608	1
chrY:53877812-53878335	1
chrY:53873533-53874053	1
chrY:69674239-69674762	1
chrY:73698870-73699393	1
chrY:69387334-69387857	1
chrY:82254804-82255327	1
chrY:35097498-35098021	1
chr7:48408350-48408837	1
chr7:48404996-48405483	1
chr19:31860447-31860911	1
chr11:49194471-49194945	1
chr7:85599830-85600306	1
chr12:74564802-74565237	1
chr12:54624877-54625331	1
chr13:99600534-99600976	2
chr8:34660648-34661090	2
chr8:34657173-34657599	2
chr14:95331929-95332372	2
chr17:12283695-12284166	2
chr17:12287708-12288179	2
chr18:82458544-82458971	2
chr2:168725308-168725754	2
chr13:52053702-52054150	2
chr13:52050447-52050895	2
chr10:41952572-41953001	2
chr15:98329102-98329545	2
chr14:71458966-71459413	2
chrX:21611817-21612259	2
chr10:114202209-114202693	2
chr17:33738034-33738486	2
chrX:15656168-15656593	2
chr5:139211314-139211774	2
chr5:19978614-19979055	2
chr13:59124955-59125410	2
chr15:93444736-93445175	2
chr9:23744401-23744847	2
chr9:23740939-23741385	2
chr17:49920725-49921165	2
chr2:78316816-78317249	2
chr5:142069184-142069615	2
chr11:73949615-73950047	2
chr11:73946193-73946626	2
chr18:57038242-57038675	2
chr15:8101868-8102406	2
chr4:25921822-25922242	2
chr2:83122176-83122604	2
chr6:22685296-22685727	2
chr2:83118038-83118474	2
chr13:119124961-119125389	2
chr8:14803251-14803687	2
chr18:25441762-25442190	2
chr14:20343888-20344301	2
chr4:42146517-42146977	2
chr4:42643676-42644136	2
chr15:82605109-82605533	2
chr15:82608552-82608976	2
chr18:24033101-24033523	2
chr18:24036513-24036935	2
chr2:150197893-150198308	2
chr12:18133113-18133536	2
chr12:18129989-18130412	2
chr7:18690268-18690732	2
chr18:21426284-21426763	2
chr15:9244713-9245173	2
chr19:39747071-39747516	2
chr17:71097974-71098431	2
chr6:42080995-42081424	2
chr6:42084372-42084752	2
chr4:59502071-59502514	2
chr19:41002337-41002766	2
chr2:71259096-71259441	2
chr14:79436478-79437114	2
chr2:11107368-11107867	2
chr1:113682227-113682666	2
chr1:113679949-113680387	2
chr2:73938320-73938797	2
chr11:121724350-121724888	2
chr11:31215163-31215612	2
chr11:31212786-31213235	2
chr7:46512161-46512582	2
chr8:110249864-110250303	2
chr13:118149214-118149676	2
chrX:150679676-150680214	2
chr6:52350612-52351051	2
chr6:52348394-52348823	2
chr10:124468615-124469035	2
chr18:5435931-5436434	2
chr1:31473419-31473852	2
chr1:31470038-31470471	2
chr11:9012652-9013132	2
chr1:96629808-96630240	2
chr4:4460555-4461015	2
chr2:108637842-108638319	2
chr14:50659535-50659968	2
chr5:71865469-71865870	2
chr5:71863116-71863519	2
chrX:107536283-107536715	2
chr2:144668997-144669570	2
chr7:21377626-21378091	2
chr7:21862879-21863344	2
chr7:23086068-23086533	2
chr7:21379882-21380347	2
chr7:23083812-23084277	2
chr7:21860623-21861088	2
chr10:110999985-111000450	2
chr2:43261356-43261771	2
chr14:107557909-107558333	2
chr13:106140690-106141146	2
chr13:106138379-106138837	2
chr14:108032882-108033363	2
chr4:152942814-152943219	2
chr4:152945377-152945782	2
chr6:112403539-112404010	2
chr5:18030026-18030426	2
chrX:11283294-11283790	2
chr4:7133537-7134017	2
chr2:18323016-18323553	2
chr5:94366286-94366717	2
chr10:126205179-126205668	2
chr14:116267364-116267854	2
chr6:143441870-143442309	2
chr12:63291945-63292429	2
chr12:63289548-63290026	2
chr17:18499792-18500253	2
chr5:6888965-6889472	2
chr13:9841764-9842276	2
chr12:35252476-35252940	2
chrX:88155319-88155729	2
chr4:113587983-113588403	2
chr6:7769307-7769825	2
chrX:92356213-92356637	2
chr14:113370624-113371015	2
chr12:109820509-109820983	2
chr15:52084321-52084800	2
chr1:32794454-32794904	2
chr14:110944074-110944541	2
chr4:82729128-82729593	2
chr1:109604596-109605003	2
chr15:17572394-17572799	2
chr15:49733681-49734090	2
chrX:117618099-117618574	2
chr3:52994296-52994671	2
chr5:50975503-50975952	2
chr2:114383485-114383886	2
chr2:155112440-155112956	2
chr4:146145578-146146071	2
chr4:147010624-147011117	2
chr4:146808210-146808703	2
chr17:39465476-39465876	2
chr17:39461385-39461784	2
chr15:52081950-52082323	2
chr5:33883399-33883829	2
chr7:81942281-81942792	2
chr2:18328921-18329391	2
chr9:82767924-82768336	2
chr11:51519679-51520123	2
chr5:17473940-17474527	2
chr14:55795014-55795472	2
chr9:118144353-118144812	2
chr7:68537340-68537788	2
chr7:68534744-68535192	2
chr1:90550525-90551012	2
chr8:45446234-45446844	2
chr17:51948372-51948811	2
chr17:51950740-51951179	2
chr3:42406811-42407328	2
chr4:5228842-5229295	2
chr10:57022799-57023241	2
chr17:38532105-38532563	2
chr13:106787846-106788290	2
chr14:6177558-6177961	2
chr14:5340422-5340827	2
chr14:5692973-5693378	2
chr3:151740656-151741121	2
chr12:43216195-43216615	2
chr19:4957687-4958223	2
chr13:79559044-79559482	2
chr1:130748257-130748702	2
chrX:163344961-163345399	2
chr5:138485756-138486220	2
chr1:112512104-112512585	2
chr15:31354608-31355229	2
chr5:100051259-100051757	2
chr6:110252567-110253076	2
chr6:148154851-148155303	2
chr6:75053806-75054240	2
chr6:75056160-75056594	2
chr10:94536213-94536617	2
chr10:95374137-95374561	2
chr14:90935341-90935934	2
chr4:61930616-61931074	2
chr1:102818017-102818484	2
chr14:119441483-119441913	2
chr14:119444827-119445257	2
chr1:101596679-101597107	2
chr6:146522524-146522942	2
chr13:64498499-64498967	2
chr13:64500673-64501141	2
chr18:19505015-19505495	2
chr18:19507480-19507961	2
chrX:117476584-117476995	2
chrX:117479046-117479465	2
chr7:6086125-6086569	2
chr5:104033470-104033909	2
chr17:72354647-72355155	2
chr6:124545850-124546307	2
chr15:84149042-84149468	2
chr15:84146539-84146965	2
chr8:74585845-74586275	2
chr8:74588198-74588628	2
chr15:27058120-27058679	2
chr10:101672268-101672710	2
chr18:75107098-75107680	2
chr14:11323540-11323988	2
chr14:11325919-11326367	2
chr17:18497449-18497894	2
chr14:109500895-109501423	2
chr2:140323572-140324061	2
chr2:140319910-140320399	2
chr15:64711024-64711488	2
chr10:104073613-104074077	2
chr7:17470345-17470811	2
chr7:17551227-17551693	2
chr5:109894139-109894575	2
chr5:109891375-109891811	2
chr16:13929998-13930474	2
chr1:135189808-135190235	2
chr3:133192330-133192830	2
chr5:74853447-74853899	2
chr18:11389881-11390315	2
chr10:25517829-25518247	2
chr8:45442915-45443547	2
chr11:49598960-49599415	2
chr6:143252397-143252969	2
chr9:8399227-8399693	2
chr9:8396786-8397252	2
chrX:143170035-143170437	2
chrX:143180714-143181118	2
chr3:23687827-23688293	2
chrX:11457389-11457811	2
chr9:122457459-122457875	2
chr13:106785334-106785780	2
chr13:81083598-81084114	2
chr13:81086199-81086715	2
chr11:6787974-6788383	2
chr8:26522794-26523200	2
chr5:89830722-89831143	2
chr18:18962215-18962618	2
chr5:7754072-7754493	2
chr5:7751575-7751996	2
chr9:78931989-78932460	2
chr10:125618799-125619232	2
chr8:100810782-100811229	2
chr9:92640990-92641428	2
chr10:29010289-29010771	2
chr16:85971449-85971939	2
chr8:47454427-47454893	2
chr8:47451937-47452349	2
chr6:138222924-138223352	2
chr1:117990083-117990549	2
chr10:43879656-43880052	2
chr18:5109643-5110123	2
chr18:5113053-5113531	2
chr1:27366980-27367415	2
chr1:17526821-17527307	2
chr1:17524390-17524923	2
chr13:66000718-66001144	2
chr13:65997129-65997557	2
chr13:66619384-66619812	2
chr12:26106454-26106836	2
chr12:26108759-26109193	2
chr17:29219030-29219469	2
chr11:94127426-94127872	2
chr13:115925904-115926342	2
chr10:47683071-47683504	2
chr10:47680605-47681038	2
chr2:120635820-120636250	2
chr2:120638839-120639271	2
chr3:23685449-23685899	2
chr14:101583720-101584207	2
chr14:101581161-101581650	2
chr17:5546170-5546688	2
chr17:18119810-18120300	2
chr10:43877087-43877540	2
chr4:74457975-74458419	2
chr6:93068407-93068854	2
chr13:103708651-103709186	2
chrX:10138262-10138805	2
chr10:29013788-29014270	2
chrX:97760281-97760658	2
chr19:57345593-57346064	2
chr6:78938104-78938529	2
chr11:21596950-21597372	2
chr3:99064435-99064881	2
chr4:142786160-142786622	2
chr12:103796026-103796500	2
chr8:53333626-53334105	2
chr8:53336260-53336739	2
chr16:88965214-88965706	2
chr16:88968640-88969102	2
chr1:28456135-28456587	2
chr18:18730089-18730554	2
chr4:9401186-9401619	2
chr13:21107267-21107704	2
chr15:21719486-21719908	2
chr15:21721838-21722260	2
chr10:82010986-82011412	2
chr10:9337212-9337636	2
chr11:55192635-55193109	2
chr10:11903249-11903811	2
chr10:11900593-11901169	2
chr8:66382154-66382624	2
chr9:12897724-12898161	2
chr3:141014697-141015115	2
chr7:131134633-131135044	2
chr7:11551238-11551665	2
chr7:11434863-11435290	2
chrX:35782327-35782786	2
chr9:17287277-17287633	2
chr15:89338153-89338581	2
chr16:22279961-22280427	2
chrX:63575435-63575881	2
chr17:27350973-27351376	2
chr17:27354578-27355047	2
chr16:77350178-77350605	2
chr12:25857266-25857675	2
chrX:61866637-61867063	2
chr9:74088059-74088510	2
chr9:111110762-111111211	2
chr8:67420364-67420780	2
chr2:112175376-112175805	2
chr19:57946976-57947423	2
chr9:117756311-117756749	2
chrX:97716252-97716798	2
chr1:136807988-136808387	2
chr17:39936673-39937102	2
chr13:62535975-62536376	2
chr4:145601414-145601844	2
chr6:133762361-133762863	2
chr4:145591238-145591642	2
chr12:20644967-20645505	2
chr10:32689871-32690282	2
chr15:96228683-96229119	2
chrX:20901822-20902242	2
chr3:111135844-111136279	2
chr3:90684699-90685148	2
chr1:133999449-133999867	2
chr18:29164112-29164550	2
chr4:3179452-3179902	2
chr6:44620050-44620501	2
chr8:6274029-6274481	2
chr1:150692385-150692818	2
chrX:67214943-67215433	2
chr5:23188105-23188543	2
chr5:23185040-23185478	2
chr3:4004032-4004524	2
chr3:4006462-4006955	2
chr8:53102224-53102769	2
chr8:53104674-53105225	2
chr14:10502749-10503188	2
chr3:72749963-72750387	2
chr10:129213656-129214082	2
chr6:147796696-147797118	2
chr10:32842899-32843388	2
chr8:39989910-39990398	2
chr3:121751275-121751716	2
chr3:121748193-121748630	2
chr9:79096684-79097108	2
chr14:53111439-53111904	2
chr14:53113897-53114354	2
chr1:179179707-179180200	2
chr3:43901564-43901943	2
chr3:43903914-43904346	2
chr14:102341474-102341923	2
chr3:44266810-44267199	2
chr1:136810234-136810714	2
chr16:48188332-48188839	2
chr16:21658297-21658764	2
chr18:43504871-43505263	2
chr4:78723200-78723632	2
chr9:18994292-18994698	2
chr7:10775524-10775984	2
chr9:74559947-74560376	2
chr1:114082909-114083348	2
chr8:75784496-75784898	2
chr9:29890567-29891003	2
chr2:53211781-53212219	2
chr8:21016845-21017251	2
chr1:108960133-108960585	2
chr1:108956814-108957214	2
chr3:159210594-159211085	2
chr11:31806414-31806883	2
chr7:14220356-14220842	2
chr14:31276965-31277424	2
chr15:19421621-19422013	2
chr9:109468363-109468822	2
chr9:109470840-109471247	2
chr14:75094255-75094704	2
chr13:98525734-98526161	2
chr8:116804887-116805328	2
chr9:36368192-36368638	2
chr18:39684142-39684590	2
chr2:104264359-104264944	2
chr5:5118690-5119146	2
chr3:30578980-30579435	2
chr7:24332250-24332681	2
chr6:63177126-63177570	2
chr16:47279597-47280093	2
chr2:181182602-181183046	2
chr6:57086680-57087110	2
chr9:116202230-116202730	2
chr6:26153414-26153859	2
chr6:26151198-26151644	2
chrX:19520172-19520609	2
chr13:93655676-93656110	2
chr11:114214175-114214638	2
chrX:117906298-117906802	2
chr14:35514204-35514600	2
chr4:103226526-103226950	2
chr1:16702088-16702603	2
chr3:147363557-147364034	2
chr7:122051611-122052119	2

## Sheet: IAPEz-int
UCSC position	Clade
chr6:131550546-131550661	1
chr7:8341837-8341979	1
chr13:98083174-98083323	1
chr3:3865713-3865860	1
chr6:112436918-112437060	1
chr8:100519108-100519250	1
chr1:121781061-121781203	1
chr18:19434232-19434374	1
chr11:65458517-65458666	1
chr7:97277737-97277879	1
chr8:114328547-114328694	1
chr16:79375464-79375605	1
chr5:43835580-43835721	1
chr9:119869132-119869273	1
chr1:52590336-52590478	1
chr3:28069464-28069605	1
chr3:17958508-17958650	1
chr6:14460208-14460349	1
chr10:97329136-97329276	1
chr17:72449783-72449932	1
chr1:4567025-4567174	1
chr18:56341308-56341457	1
chr15:70911396-70911543	1
chr16:86075187-86075329	1
chr1:146288571-146288713	1
chr11:88917754-88917869	1
chr4:143645239-143645388	1
chr4:30235369-30235484	1
chr6:140990851-140991000	1
chr2:81460790-81460932	1
chr11:71044099-71044248	1
chr9:119861572-119861713	1
chrY:61601434-61601575	1
chrY:48811177-48811318	1
chrY:76716283-76716424	1
chrY:68877938-68878079	1
chr2:16585462-16585577	1
chr10:32937090-32937239	1
chr15:92729550-92729692	1
chr9:11633003-11633136	1
chr4:60407354-60407496	1
chr4:61767652-61767794	1
chr12:114633685-114633827	1
chr5:33332107-33332249	1
chr3:14241627-14241769	1
chr9:92408670-92408817	1
chrX:17500104-17500251	1
chr1:21582106-21582253	1
chr14:24416579-24416721	1
chr2:89265065-89265207	1
chr11:79236486-79236633	1
chr13:87374580-87374727	1
chr15:73377578-73377720	1
chrX:95350342-95350489	1
chr9:5280598-5280740	1
chr6:95475919-95476066	1
chr2:134747146-134747293	1
chr14:83870230-83870377	1
chr15:103607170-103607317	1
chr14:83866437-83866584	1
chr2:6773542-6773689	1
chrX:92248849-92248996	1
chr2:144631736-144631883	1
chrX:154822054-154822201	1
chr15:59871174-59871321	1
chr5:55653203-55653350	1
chr14:110364898-110365045	1
chr10:129395602-129395749	1
chr11:6531955-6532102	1
chr17:27269291-27269424	1
chr18:58322120-58322253	1
chr7:144353959-144354092	1
chr2:80230303-80230436	1
chr1:180612592-180612725	1
chrX:168177131-168177264	1
chr2:118555270-118555403	1
chr6:140322467-140322600	1
chr6:61511898-61512031	1
chrY:43772518-43772651	1
chr2:166531153-166531286	1
chr6:41243354-41243487	1
chr5:136204713-136204846	1
chr15:8552386-8552519	1
chr8:100601983-100602122	1
chr14:42320824-42320957	1
chr5:140534302-140534435	1
chr15:12527286-12527425	1
chr1:112568804-112568943	1
chr15:12527284-12527417	1
chr7:62840590-62840723	1
chr5:151471116-151471255	1
chr5:151471114-151471247	1
chr8:100167290-100167423	1
chr2:12045799-12045932	1
chr18:40712982-40713129	1
chr9:71082869-71083016	1
chr2:147004554-147004701	1
chr2:147000041-147000188	1
chr18:45295671-45295818	1
chr2:97188597-97188739	1
chr18:3047993-3048133	1
chr2:165678958-165679105	1
chr3:13794575-13794722	1
chr9:73900631-73900780	1
chr17:22635500-22635647	1
chr18:89616292-89616441	1
chr6:112241346-112241494	1
chrY:35098024-35098171	1
chrY:69678371-69678518	1
chrY:73703002-73703149	1
chrY:53877662-53877809	1
chrY:69391466-69391613	1
chrY:82258935-82259082	1
chr13:62663820-62663969	1
chr18:17465279-17465428	1
chr6:120812723-120812865	1
chr12:3058745-3058894	1
chr15:20159215-20159357	1
chr6:148170854-148170996	1
chr6:22173876-22174017	1
chr7:85378108-85378255	1
chr16:70275066-70275215	1
chrY:15899349-15899491	1
chrY:11213950-11214092	1
chr10:62609372-62609519	1
chr15:94057919-94058061	1
chr11:18813138-18813280	1
chr5:144862034-144862176	1
chr17:77920978-77921120	1
chr2:123225572-123225705	1
chr19:20459809-20459951	1
chr18:45364164-45364306	1
chrY:81095365-81095514	1
chrY:23529960-23530109	1
chrY:21882333-21882482	1
chrY:35752542-35752691	1
chr2:156118706-156118855	1
chr2:51886686-51886828	1
chr11:31454213-31454362	1
chr9:114874578-114874725	1
chr8:124120793-124120926	1
chr3:133298231-133298364	1
chr13:4464062-4464195	1
chr5:64896042-64896175	1
chr6:27129257-27129390	1
chr6:146707714-146707853	1
chr11:16228880-16229022	1
chrX:17504640-17504787	1
chr17:67001586-67001728	1
chr6:132560466-132560608	1
chr8:4854170-4854312	1
chr6:146707689-146707831	1
chr2:99552031-99552173	1
chr1:93111108-93111255	1
chr6:105698620-105698762	1
chr9:123197701-123197842	1
chr2:32473839-32473981	1
chr6:146690176-146690319	1
chr15:14727284-14727432	1
chrY:2605700-2605808	1
chr17:81232211-81232326	1
chrY:40008346-40008488	1
chr9:79096496-79096628	1
chr1:108957216-108957357	1
chr6:26151646-26151787	1
chr12:35252942-35253083	1
chr13:81086049-81086197	1
chr17:18497905-18498020	1
chr7:21862736-21862877	1
chr7:23085925-23086066	1
chr2:78317345-78317477	1
chr14:53111906-53112047	1
chr6:52350469-52350610	1
chr13:106138910-106139040	1
chr10:104074079-104074220	1
chr7:21379739-21379880	1
chr17:18120348-18120478	1
chr12:63290082-63290221	1
chr1:17526678-17526819	1
chr1:113682077-113682225	1
chrX:126179352-126179499	1
chr5:109893996-109894137	1
chr10:47682921-47683069	1
chr10:43877542-43877683	1
chr15:17572801-17572942	1
chr8:74588055-74588196	1
chr10:29013645-29013786	1
chr10:124468472-124468613	1
chr14:101581656-101581800	1
chr4:152945234-152945375	1
chr13:106785782-106785930	1
chr2:140320401-140320542	1
chr13:64500523-64500671	1
chr5:23185480-23185621	1
chr17:51948813-51948954	1
chr7:68535194-68535342	1
chr3:23687677-23687825	1
chr8:53336110-53336257	1
chr1:117990551-117990692	1
chrX:143180571-143180712	1
chr1:136810084-136810232	1
chrX:97760138-97760279	1
chr3:4004526-4004674	1
chr10:34748982-34749129	1
chr13:66000568-66000716	1
chr10:11903099-11903247	1
chr5:7753929-7754070	1
chr1:31470473-31470621	1
chr10:129214084-129214225	1
chr6:42084229-42084370	1
chr18:19507337-19507478	1
chr12:20644824-20644965	1
chr2:111548662-111548803	1
chr5:109725644-109725792	1
chr17:21345576-21345725	1
chr17:39465333-39465474	1
chr11:31213237-31213378	1
chr9:82768338-82768479	1
chr12:18130414-18130562	1
chr3:121748632-121748780	1
chr9:109468867-109469002	1
chr6:57093477-57093618	1
chrX:117476997-117477145	1
chr8:53104531-53104672	1
chr8:47454277-47454425	1
chr5:6889474-6889622	1
chr15:52082325-52082466	1
chr8:45443549-45443690	1
chr12:26108616-26108757	1
chr3:43901945-43902086	1
chr9:8399084-8399225	1
chr9:18994142-18994289	1
chr6:75056017-75056158	1
chr15:84148899-84149040	1
chr17:27354435-27354576	1
chr16:88968497-88968638	1
chr15:21719910-21720051	1
chr14:29761803-29761952	1
chr18:5112910-5113051	1
chr7:48405485-48405626	1
chr4:25922244-25922385	1
chr10:111000563-111000695	1
chr14:11323990-11324131	1
chr11:73949472-73949613	1
chr5:71863521-71863669	1
chr8:34660505-34660646	1
chr9:23741387-23741528	1
chr13:59124812-59124953	1
chr5:142069041-142069182	1
chr13:52050897-52051038	1
chr2:150197758-150197881	1
chr5:19978464-19978612	1
chr5:75305736-75305877	1
chr2:120638696-120638837	1
chr15:82608409-82608550	1
chr18:24036370-24036511	1
chr2:83122033-83122174	1
chr6:22685153-22685294	1
chr12:54625333-54625474	1
chr14:119444684-119444825	1
chr19:31856239-31856380	1
chr17:12284168-12284309	1
chr13:118149760-118149900	1
chr4:113588405-113588553	1
chr2:20258314-20258462	1
chr16:78448677-78448819	1
chr3:116760897-116761046	1
chr11:19793089-19793238	1
chr4:7302190-7302332	1
chrX:80562266-80562408	1
chr14:65183027-65183176	1
chr10:3320789-3320938	1
chr10:122307995-122308144	1
chr16:98100815-98100964	1
chr8:19674455-19674597	1
chr15:97556941-97557083	1
chr15:60801427-60801576	1
chr6:147894095-147894244	1
chr13:114543142-114543284	2
chr2:36014890-36015032	2
chr4:42380670-42380812	2
chr4:42028459-42028601	2
chr1:149520885-149521027	2
chr4:117696038-117696180	2
chr3:111604656-111604798	2
chr11:19570040-19570182	2
chr5:11476090-11476232	2
chr9:71424803-71424945	2
chr8:120199221-120199363	2
chr5:98211433-98211575	2
chr1:108040396-108040538	2
chr6:117591912-117592054	2
chrX:58359005-58359147	2
chr12:6516841-6516983	2
chr1:103032036-103032178	2
chr14:85889465-85889607	2
chrX:12231785-12231927	2
chr3:148750513-148750655	2
chr3:11124382-11124524	2
chr5:46940889-46941031	2
chr13:115965544-115965686	2
chr6:59693338-59693480	2
chr1:127564975-127565117	2
chr5:41401956-41402098	2
chr11:27956547-27956689	2
chr16:88797325-88797467	2
chr4:42465688-42465830	2
chr8:63746057-63746199	2
chr12:65807843-65807985	2
chr7:77219257-77219399	2
chr12:119591088-119591232	2
chr8:25878044-25878186	2
chr11:55247520-55247662	2
chr2:151205321-151205463	2
chr3:42826907-42827049	2
chr13:11501465-11501607	2
chr3:5518117-5518259	2
chr7:24583637-24583779	2
chr4:118190076-118190218	2
chr5:124110455-124110597	2
chr13:32942809-32942951	2
chr9:98683072-98683187	2
chr4:75623445-75623587	2
chr11:63468139-63468254	2
chr12:68628397-68628509	2
chr9:76738782-76738924	2
chr17:13420594-13420736	2
chr6:73213074-73213189	2
chr9:87491990-87492102	2
chr14:104589244-104589359	2
chr3:85628895-85629037	2
chr6:142149310-142149452	2
chr13:66012635-66012777	2
chrY:74732426-74732575	2
chr6:143883901-143884048	2
chr12:25592294-25592441	2
chr5:23572772-23572919	2
chrY:87777215-87777362	2
chr2:156211461-156211608	2
chrY:21226458-21226570	2
chr16:80288195-80288337	2
chr17:65462116-65462258	2
chr18:90117948-90118090	2
chr2:163795613-163795755	2
chr13:45011505-45011647	2
chr3:84149049-84149191	2
chr10:83677504-83677646	2
chr14:81088217-81088359	2
chr10:116612866-116613008	2
chr16:12337202-12337344	2
chr9:74634108-74634250	2
chr5:38134193-38134335	2
chr1:89199462-89199604	2
chr13:5278429-5278571	2
chr2:63302252-63302394	2
chr3:69644564-69644706	2
chr6:65391412-65391554	2
chr2:107600649-107600791	2
chrX:99908207-99908349	2
chr2:41744721-41744863	2
chrX:162985247-162985389	2
chr10:57138055-57138197	2
chr3:4725000-4725142	2
chr11:74226247-74226389	2
chr6:68289886-68290028	2
chr19:54995320-54995462	2
chr15:54187444-54187586	2
chr5:45395781-45395923	2
chr17:51864791-51864933	2
chr9:78829876-78830018	2
chr1:111260210-111260352	2
chr18:6372368-6372510	2
chr7:107270995-107271137	2
chr14:32399862-32400004	2
chr9:89068261-89068403	2
chrX:119682498-119682640	2
chr2:74371060-74371202	2
chr12:111388575-111388717	2
chr2:87769741-87769883	2
chr2:124799315-124799457	2
chr3:117379521-117379663	2
chr6:13773431-13773573	2
chr5:80058567-80058709	2
chr2:35519875-35520017	2
chr6:145492877-145493019	2
chr1:53134273-53134415	2
chr13:98329907-98330049	2
chr8:22551539-22551681	2
chr6:98824090-98824232	2
chr3:133124014-133124156	2
chr6:123677738-123677880	2
chr7:82741404-82741546	2
chr12:41363898-41364040	2
chr2:83580666-83580808	2
chr16:71792171-71792313	2
chr1:56772586-56772728	2
chr15:4858679-4858821	2
chr2:21075293-21075435	2
chr11:9714574-9714716	2
chr5:57018081-57018223	2
chr1:6168463-6168605	2
chr9:123749315-123749457	2
chr4:117192478-117192620	2
chr10:34748431-34748573	2
chr1:126424412-126424554	2
chr11:20516781-20516923	2
chrX:160285960-160286102	2
chr2:50679945-50680087	2
chr11:116785962-116786104	2
chrX:126143929-126144071	2
chr3:68732885-68733027	2
chr10:107999886-108000028	2
chr15:73087458-73087600	2
chr7:124811328-124811470	2
chr7:85933000-85933142	2
chr3:123475639-123475781	2
chr7:11058140-11058282	2
chr1:55778732-55778874	2
chr1:103211776-103211918	2
chr12:31364731-31364873	2
chr8:50597551-50597693	2
chr2:86346331-86346473	2
chr13:81891330-81891472	2
chr2:101146713-101146855	2
chr14:9045316-9045458	2
chrX:75582539-75582681	2
chr5:37924705-37924847	2
chr13:83419380-83419522	2
chr13:4338817-4338959	2
chr13:33862386-33862528	2
chr19:15839801-15839943	2
chr4:38906247-38906389	2
chr1:87140340-87140482	2
chr4:38870432-38870574	2
chr19:55977120-55977262	2
chr13:43277898-43278040	2
chr11:90902080-90902222	2
chr13:7955747-7955889	2
chr2:126971609-126971751	2
chr16:32195889-32196038	2
chr12:80417615-80417757	2
chr16:77121271-77121413	2
chr2:151179576-151179725	2
chr5:82882629-82882771	2
chr6:14091730-14091872	2
chrX:151584739-151584881	2
chr10:54589127-54589269	2
chr10:31750492-31750634	2
chr7:53682638-53682780	2
chr11:73740294-73740443	2
chr17:87749415-87749557	2
chr6:111935845-111935989	2
chr2:136274921-136275069	2
chr1:144861280-144861422	2
chr3:64657927-64658069	2
chr17:17473160-17473302	2
chr16:51087529-51087671	2
chrX:19662041-19662183	2
chr1:34347810-34347952	2
chrX:152895044-152895186	2
chr5:94804402-94804544	2
chr1:67758058-67758200	2
chr3:34853036-34853178	2
chr13:62479626-62479768	2
chr4:75309711-75309853	2
chr7:9082592-9082734	2
chr18:85382264-85382406	2
chr19:39606600-39606742	2
chr7:142220248-142220390	2
chrX:137967858-137968000	2
chr11:115761506-115761648	2
chr19:39387778-39387920	2
chr14:53479195-53479337	2
chr8:89924769-89924913	2
chrY:31340412-31340554	2
chr4:141209968-141210115	2
chrY:33213607-33213749	2
chr13:21636415-21636557	2
chr10:80976410-80976524	2
chr2:93831362-93831504	2
chr8:6987298-6987440	2
chr7:3770647-3770789	2
chr9:120640736-120640878	2
chr15:56176168-56176312	2
chrY:3335681-3335825	2
chr7:127619153-127619300	2
chr13:15431833-15431977	2
chr12:24395734-24395878	2
chr3:152808267-152808414	2
chr11:15228086-15228228	2
chr2:8528837-8528979	2
chr4:155683300-155683444	2
chr10:99339405-99339547	2
chr5:77566248-77566390	2
chrY:2881107-2881249	2
chrY:2777412-2777554	2
chr5:40478081-40478228	2
chr8:91433871-91434018	2
chr4:98531464-98531606	2
chr5:64031310-64031457	2
chr1:66024343-66024487	2
chr17:68297034-68297176	2
chr2:155127752-155127894	2
chr3:25417219-25417361	2
chr12:17122522-17122664	2
chr5:20190448-20190590	2
chr1:125317130-125317272	2
chr10:56721117-56721259	2
chr18:21262122-21262264	2
chr8:67793187-67793336	2
chr15:23246970-23247112	2
chr17:37954359-37954501	2
chr8:18579559-18579708	2
chr15:44654637-44654779	2
chr9:12773749-12773891	2
chr5:92476463-92476605	2
chr14:80627224-80627366	2
chr2:55873768-55873910	2
chr11:110020058-110020200	2
chr7:106314097-106314239	2
chr9:19724892-19725041	2
chr13:111700306-111700455	2
chr13:4069408-4069557	2
chr17:39274896-39275045	2
chr10:112053901-112054050	2
chrX:152967439-152967588	2
chr10:99102932-99103074	2
chr17:38268147-38268296	2
chr8:94795635-94795784	2
chr1:11891177-11891326	2
chr6:55026669-55026818	2
chr1:110941937-110942086	2
chr5:3180805-3180947	2
chr14:10185367-10185509	2
chr8:61371032-61371174	2
chr6:139830801-139830943	2
chr1:152663262-152663404	3
chr7:91283406-91283519	3
chr3:116818020-116818162	3
chr4:51895116-51895258	3
chr5:6184466-6184608	3
chr14:124684888-124685030	3
chr12:68745607-68745749	3
chr7:12547367-12547509	3
chrX:54232071-54232213	3
chr14:64468144-64468286	3
chr2:95069556-95069698	3
chr3:61274272-61274421	3
chr16:34582727-34582869	3
chr16:79943489-79943638	3
chr8:105007989-105008131	3
chr11:22340009-22340151	3
chr2:154354657-154354799	3
chr7:128609461-128609603	3
chrX:120977114-120977256	3
chr1:140817162-140817304	3
chr8:126413993-126414135	3
chr7:137415399-137415541	3
chr9:32846001-32846143	3
chr1:148485823-148485965	3
chr7:138695690-138695839	3
chr15:43330990-43331139	3
chr5:129437874-129438023	3
chr16:81072153-81072295	3
chr13:117296156-117296298	3
chr16:80304762-80304904	3
chrX:127940661-127940803	3
chr3:75419062-75419204	3
chr6:117339493-117339635	3
chr1:148274566-148274708	3
chrX:115550167-115550316	3
chr1:87460480-87460622	3
chrX:4463267-4463416	3
chr13:102827457-102827599	3
chr18:11626413-11626555	3
chr3:54849532-54849674	3
chr10:77951084-77951226	3
chr14:37235774-37235916	3
chr17:74765767-74765909	3
chr14:19012526-19012668	3
chr11:74540564-74540706	3
chr14:90295027-90295169	3
chr18:68412596-68412738	3
chr5:127742868-127743010	3
chr5:7944742-7944884	3
chr9:110975305-110975447	3
chr19:52985974-52986116	3
chr17:8216337-8216479	3
chr18:46439531-46439673	3
chr13:99818586-99818728	3
chr1:139725170-139725312	3
chr14:7357262-7357404	3
chr18:60533179-60533321	3
chr17:75902167-75902309	3
chr8:24767780-24767922	3
chr16:83361083-83361225	3
chr11:61420737-61420879	3
chr8:101360973-101361115	3
chr9:44371975-44372117	3
chr15:37096865-37097007	3
chr16:31578544-31578686	3
chr1:115890093-115890235	3
chr6:139141565-139141707	3
chr2:17752164-17752306	3
chr13:115889525-115889674	3
chr3:51616599-51616748	3
chr5:85074259-85074408	3
chr13:103930344-103930493	3
chr9:58778760-58778909	3
chr4:62574039-62574188	3
chr9:8628637-8628786	3
chr6:18757897-18758046	3
chr8:121405675-121405824	3
chr14:78335175-78335318	3
chr13:120224854-120225003	3
chr4:122213189-122213338	3
chr9:11793297-11793446	3
chr2:151334313-151334462	3
chr9:83942964-83943113	3
chr10:33887187-33887336	3
chr3:115909517-115909659	3
chr7:138262165-138262307	3
chr14:42775882-42776024	3
chr1:103589099-103589241	3
chr11:108650303-108650445	3
chr16:50910182-50910324	3
chr10:78020624-78020766	3
chr7:121851282-121851424	3
chr1:38705207-38705349	3
chr8:113280719-113280861	3
chr2:17612910-17613059	3
chr19:57831972-57832121	3
chr5:83591032-83591181	3
chr2:145630100-145630249	3
chr2:111861393-111861542	3
chr6:101143224-101143373	3
chr4:74932054-74932203	3
chr1:142360880-142361029	3
chr15:12062522-12062671	3
chr12:82465875-82466024	3
chr8:47088756-47088905	3
chr12:94043186-94043335	3
chr13:108002509-108002658	3
chr8:16795038-16795187	3
chr8:21675797-21675946	3
chr4:39957704-39957853	3
chr5:105424174-105424323	3
chr6:128911301-128911450	3
chr14:119962869-119963018	3
chr4:119652391-119652540	3
chr1:69702891-69703040	3
chr7:4199733-4199882	3
chr8:8320132-8320281	3
chr13:52294395-52294544	3
chr18:28965131-28965280	3
chr13:111500053-111500202	3
chr5:73465870-73466019	3
chr5:22201419-22201568	3
chr5:143427624-143427773	3
chr12:8403559-8403708	3
chr7:137894772-137894921	3
chr7:26904873-26905022	3
chrX:81765368-81765489	3
chrX:22570586-22570728	3
chr15:86317093-86317242	3
chr5:92614923-92615033	3
chr17:13413841-13413983	3
chr7:21412795-21412937	3
chr6:132495798-132495940	3
chr7:118273065-118273207	3
chr2:166816977-166817119	3
chrX:62084473-62084622	3
chr2:167408398-167408547	3
chr9:121025096-121025245	3
chr17:84883330-84883479	3
chr3:140120364-140120506	3
chr8:46350259-46350408	3
chr3:84365822-84365964	3
chr17:65161314-65161456	3
chr14:41464259-41464401	3
chrX:72942305-72942447	3
chr8:128557463-128557579	3
chr5:145330384-145330526	3
chr4:147840167-147840309	3
chr7:30385664-30385780	3
chr3:77597739-77597855	3
chrY:89125392-89125535	3
chr17:68948311-68948427	3
chr8:27464971-27465113	3
chr1:160820547-160820689	3
chr8:29515824-29515966	3
chr8:119045552-119045694	3
chr11:116389793-116389935	3
chr1:26353894-26354036	3
chr16:12976734-12976876	3
chr5:64564567-64564709	3
chr9:90863952-90864094	3
chr15:22751832-22751974	3
chr11:90834321-90834463	3
chr16:36769812-36769954	3
chr2:72275089-72275231	3
chr2:105558272-105558387	3
chr1:192155834-192155976	3
chr1:48089475-48089617	3
chrX:81647085-81647228	3
chr11:108403900-108404042	3
chr13:87353638-87353780	3
chr13:51985864-51986006	3
chr14:108169868-108170010	3
chr6:10711903-10712045	3
chr4:127008876-127009018	3
chr16:89443337-89443479	3
chr8:13719642-13719784	3
chrX:113910744-113910886	3
chrX:96348193-96348335	3
chr10:83787829-83787971	3
chr3:68114794-68114936	3
chr14:113288492-113288634	3
chr10:31088966-31089108	3
chr16:70542847-70542989	3
chrX:8518184-8518326	3
chr7:89573288-89573430	3
chr11:51669739-51669881	3
chr5:47970847-47970989	3
chr7:83928439-83928581	3
chr13:114626945-114627087	3
chr1:142589657-142589799	3
chr4:111838451-111838593	3
chr13:28131011-28131153	3
chr17:69541753-69541895	3
chr7:104273469-104273611	3
chr5:16291502-16291644	3
chr5:12169014-12169156	3
chr17:6349538-6349680	3
chr2:3488265-3488407	3
chr3:13826004-13826146	3
chr16:58654999-58655141	3
chr13:56719484-56719626	3
chr3:104594851-104594993	3
chr1:120575529-120575671	3
chr1:62540724-62540866	3
chr10:90329254-90329396	3
chr1:127896713-127896855	3
chr7:94988223-94988365	3
chr9:98766747-98766896	3
chr8:55547118-55547267	3
chr4:68115789-68115938	3
chr13:111068156-111068305	3
chr10:104824303-104824452	3
chr10:65955637-65955786	3
chr8:102009793-102009942	3
chr8:13715238-13715387	3
chr1:109133430-109133579	3
chrX:33214186-33214335	3
chr14:78789388-78789537	3
chr15:20977664-20977813	3
chr11:12512114-12512263	3
chrX:98106218-98106367	3
chr7:79341945-79342046	3
chr9:88821720-88821836	3
chr10:96161928-96162070	3
chr13:97848418-97848560	3
chr4:41455134-41455276	3
chr2:177609287-177609429	3
chr3:159230612-159230754	3
chr4:101128741-101128883	3
chr16:82242596-82242738	3
chr10:105677387-105677529	3
chr7:4460208-4460350	3
chr2:98801363-98801505	3
chr5:133954265-133954407	3
chr6:71960242-71960384	3
chr7:119417441-119417583	3
chr12:108083921-108084063	3
chr8:94621343-94621485	3
chr4:52891849-52891991	3
chr5:57691705-57691847	3
chr17:89935919-89936061	3
chr2:138035456-138035598	3
chr3:51240387-51240529	3
chrX:79688800-79688942	3
chr10:84744996-84745138	3
chr2:46579020-46579162	3
chr2:84505545-84505687	3
chr5:143005049-143005191	3
chr16:53571836-53571978	3
chr2:7404427-7404569	3
chr15:39173391-39173533	3
chr6:149269640-149269782	3
chr5:105728903-105729045	3
chrX:143179189-143179331	3
chr3:60494607-60494749	3
chr9:122408261-122408403	3
chr1:76777503-76777645	3
chr2:26337963-26338105	3
chr8:72232471-72232613	3
chr3:96494053-96494202	3
chr11:29124894-29125036	3
chr1:110329453-110329595	3
chr4:111572176-111572318	3
chr10:124606112-124606254	3
chr15:77901861-77902003	3
chrX:155855809-155855951	3
chr1:104294324-104294466	3
chr5:96490153-96490295	3
chr13:63222635-63222777	3
chr16:11680405-11680554	3
chr10:24686814-24686956	3
chr8:23546030-23546172	3
chr4:102882341-102882483	3
chr3:73733533-73733675	3
chr2:177156946-177157088	3
chr4:4890189-4890331	3
chr17:45644997-45645139	3
chr2:145123212-145123354	3
chr1:178058388-178058503	3
chr15:74367399-74367541	3
chr18:47653460-47653602	3
chr7:129566208-129566350	3
chr1:108415532-108415674	3
chrX:121445726-121445868	3
chr3:82487485-82487627	3
chr6:87408763-87408905	3
chr17:63748910-63749052	3
chr12:52734813-52734955	3
chr3:26347273-26347415	3
chrX:91817330-91817472	3
chr17:80854299-80854441	3
chr1:45734427-45734569	3
chr17:76513014-76513156	3
chr1:126939526-126939668	3
chr8:3338639-3338781	3
chr13:100593728-100593870	3
chr6:10689929-10690071	3
chr10:59382167-59382309	3
chr4:78512516-78512658	3
chr6:31804129-31804271	3
chr11:106033051-106033193	3
chr6:28928856-28928998	3
chr1:23301468-23301610	3
chr17:50078279-50078421	3
chr1:114185639-114185781	3
chr13:9439392-9439541	3
chr2:161369181-161369330	3
chr7:51419485-51419634	3
chr18:66750492-66750634	3
chr18:83700998-83701140	3
chr6:4363404-4363546	3
chr2:148410958-148411093	3
chr3:156804283-156804425	3
chrX:89300613-89300755	3
chr9:10198126-10198268	3
chr1:149512961-149513103	3
chr10:70791738-70791880	3
chr5:83021512-83021654	3
chr15:90643143-90643259	3
chr9:39898350-39898466	3
chrY:42513397-42513539	3
chr16:33852053-33852202	3
chr7:60769597-60769746	3
chr5:60808491-60808640	3
chr5:91233486-91233635	3
chrX:3708959-3709108	3
chr6:97372627-97372776	3
chr11:26555830-26555979	3
chr11:64792475-64792624	3
chr11:22578079-22578228	3
chr13:86773056-86773205	3
chr10:21211557-21211706	3
chr1:19622728-19622877	3
